# Supplementary material for: Long Noncoding RNA Expression Signatures of Colon Cancer Based on the ceRNA Network and Their Prognostic Value
Source: Dis Markers. 2019 Mar 11;2019:7636757. doi: 10.1155/2019/7636757 (PMC6432706; doi:10.1155/2019/7636757)
Supplement: Supplementary 3 — Doc S2: ceRNA crosstalk identified in the COAD database. [file 7636757.f3.xlsx]

## Sheet: Sheet1
gene	miRNA	lncRNA
AKT3	hsa-miR-15a-5p	LINC00641
AKT3	hsa-miR-16-5p	LINC00641
ATAT1	hsa-miR-23a-3p	LINC00641
AURKB	hsa-let-7a-5p	RP11-458F8.4
AXIN2	hsa-miR-15b-5p	RP11-2C24.4
AXIN2	hsa-miR-16-5p	STAG3L5P-PVRIG2P-PILRB
AXIN2	hsa-miR-15b-5p	STAG3L5P-PVRIG2P-PILRB
AXIN2	hsa-miR-107	STAG3L5P-PVRIG2P-PILRB
BCL2	hsa-miR-15a-5p	LINC00641
BCL2	hsa-miR-16-5p	LINC00641
BCL2	hsa-miR-15b-5p	LINC00641
BCL2	hsa-miR-136-5p	MAGI2-AS3
BCL2	hsa-miR-17-5p	RP11-399O19.9
BCL2	hsa-miR-20a-5p	RP11-399O19.9
BCL2L11	hsa-miR-19b-3p	RP11-284N8.3
BCL2L11	hsa-miR-17-5p	RP11-399O19.9
BIRC5	hsa-miR-497-5p	RP11-2C24.4
BIRC5	hsa-miR-16-5p	STAG3L5P-PVRIG2P-PILRB
BMP2	hsa-miR-106a-5p	RP11-399O19.9
BMP2	hsa-miR-17-5p	RP11-399O19.9
BRCA1	hsa-miR-15a-5p	LINC00641
BRCA1	hsa-miR-16-5p	LINC00641
BRCA1	hsa-miR-15a-5p	RP11-2C24.4
BRCA1	hsa-miR-16-5p	STAG3L5P-PVRIG2P-PILRB
BRCA1	hsa-miR-15a-5p	STAG3L5P-PVRIG2P-PILRB
CASP7	hsa-miR-106a-5p	RP11-399O19.9
CAV1	hsa-miR-107	RP11-588K22.2
CAV1	hsa-miR-107	RP11-798M19.6
CCNA2	hsa-miR-132-3p	MIR17HG
CCND1	hsa-miR-15b-5p	RP11-2C24.4
CCND1	hsa-miR-15a-5p	RP11-2C24.4
CCND1	hsa-let-7b-5p	RP11-458F8.4
CCND1	hsa-miR-17-5p	RP13-942N8.1
CCND1	hsa-miR-16-5p	STAG3L5P-PVRIG2P-PILRB
CCND1	hsa-miR-15a-5p	STAG3L5P-PVRIG2P-PILRB
CCND1	hsa-miR-15b-5p	STAG3L5P-PVRIG2P-PILRB
CCNE1	hsa-miR-15b-5p	RP11-2C24.4
CCNE1	hsa-miR-497-5p	RP11-2C24.4
CCNE1	hsa-miR-15a-5p	RP11-2C24.4
CCNE1	hsa-miR-26a-5p	RP11-305E6.4
CCNE1	hsa-miR-16-5p	STAG3L5P-PVRIG2P-PILRB
CCNE1	hsa-miR-15a-5p	STAG3L5P-PVRIG2P-PILRB
CCNE1	hsa-miR-15b-5p	STAG3L5P-PVRIG2P-PILRB
CCR7	hsa-let-7a-5p	RP11-834C11.4
CCR7	hsa-let-7a-5p	TRG-AS1
CDC25A	hsa-miR-497-5p	RP11-2C24.4
CDC25A	hsa-miR-15a-5p	RP11-2C24.4
CDC25A	hsa-let-7b-5p	RP11-458F8.4
CDC25A	hsa-miR-141-3p	RP1-239B22.5
CDC25A	hsa-miR-15a-5p	STAG3L5P-PVRIG2P-PILRB
CDC25C	hsa-miR-141-3p	RP1-239B22.5
CDC6	hsa-miR-26a-5p	RP11-305E6.4
CDK4	hsa-miR-497-5p	RP11-2C24.4
CDKN1A	hsa-miR-28-5p	LINC00294
CDKN1A	hsa-miR-106a-5p	RP11-399O19.9
CDKN1A	hsa-miR-17-5p	RP11-399O19.9
CDKN1A	hsa-miR-20a-5p	RP11-399O19.9
CDKN1A	hsa-let-7a-5p	TRG-AS1
CHEK1	hsa-miR-26a-5p	GAS5
CHEK1	hsa-miR-26a-5p	LINC-PINT
CHEK1	hsa-miR-497-5p	RP11-2C24.4
CHEK1	hsa-miR-26a-5p	RP11-305E6.4
CHEK1	hsa-miR-16-5p	STAG3L5P-PVRIG2P-PILRB
CKS2	hsa-miR-26a-5p	GAS5
CKS2	hsa-miR-26a-5p	RP11-305E6.4
COL1A2	hsa-let-7g-5p	RP11-834C11.4
CPEB1	hsa-miR-101-3p	ATP2B1-AS1
CPEB1	hsa-miR-101-3p	PWAR6
CPEB3	hsa-miR-26a-5p	PWAR6
CPEB3	hsa-miR-26a-5p	RP11-120E11.2
CPEB3	hsa-miR-26a-5p	RP11-284N8.3
CROT	hsa-miR-33a-5p	RP11-284N8.3
CSF1	hsa-miR-130a-3p	MAGI2-AS3
CSF1	hsa-miR-130b-3p	MAGI2-AS3
CXCL12	hsa-miR-23a-3p	LINC00641
CXCL12	hsa-miR-23a-3p	MAGI2-AS3
CXCL12	hsa-miR-23a-3p	RP11-284N8.3
CXCL12	hsa-miR-23a-3p	RP11-545I5.3
CYP19A1	hsa-let-7f-5p	KCNQ1OT1
CYP19A1	hsa-miR-19b-3p	KCNQ1OT1
CYP19A1	hsa-miR-106a-5p	RP11-399O19.9
DNMT3B	hsa-miR-26a-5p	RP11-305E6.4
DPYD	hsa-miR-27a-3p	AC010226.4
DPYD	hsa-miR-27a-3p	RP11-284N8.3
DYRK2	hsa-let-7f-5p	RP11-834C11.4
DYRK2	hsa-let-7f-5p	TRG-AS1
E2F1	hsa-let-7a-5p	RP11-458F8.4
E2F1	hsa-miR-17-5p	RP13-942N8.1
E2F5	hsa-miR-181a-5p	ALMS1-IT1
E2F5	hsa-miR-181a-5p	LINC-PINT
EPAS1	hsa-miR-17-5p	RP11-399O19.9
EPAS1	hsa-miR-20a-5p	RP11-399O19.9
ESR1	hsa-miR-22-3p	KCNQ1OT1
ESR1	hsa-miR-26a-5p	KCNQ1OT1
ESR1	hsa-miR-19b-3p	KCNQ1OT1
ESR1	hsa-miR-29b-3p	KCNQ1OT1
ESR1	hsa-miR-26a-5p	LINC-PINT
ESR1	hsa-miR-130a-3p	MAGI2-AS3
ESR1	hsa-miR-26a-5p	MALAT1
ESR1	hsa-miR-22-3p	MALAT1
ESR1	hsa-miR-26a-5p	PWAR6
ESR1	hsa-miR-26a-5p	RP11-120E11.2
ESR1	hsa-miR-26a-5p	RP11-284N8.3
ESR1	hsa-miR-19b-3p	RP11-284N8.3
EZH2	hsa-miR-26b-5p	GAS5
EZH2	hsa-miR-26a-5p	GAS5
EZH2	hsa-miR-26a-5p	LINC-PINT
EZH2	hsa-miR-26a-5p	RP11-305E6.4
EZH2	hsa-let-7a-5p	RP11-458F8.4
FAS	hsa-miR-23a-3p	LINC00641
FAS	hsa-miR-23a-3p	MAGI2-AS3
FAS	hsa-miR-23a-3p	RP11-284N8.3
FAS	hsa-miR-106a-5p	RP11-399O19.9
FAS	hsa-miR-23a-3p	RP11-545I5.3
FGF7	hsa-miR-15a-5p	LINC00641
FGF9	hsa-miR-26a-5p	RP11-120E11.2
FGF9	hsa-miR-26a-5p	RP11-284N8.3
FGFR1	hsa-miR-16-5p	LINC00641
GPX2	hsa-miR-17-3p	PVT1
HAND2	hsa-miR-1-3p	LINC01197
HMGA1	hsa-miR-26a-5p	GAS5
HMGA1	hsa-miR-15a-5p	RP11-2C24.4
HMGA1	hsa-miR-26a-5p	RP11-305E6.4
HMGA1	hsa-let-7b-5p	RP11-458F8.4
HMGA1	hsa-let-7a-5p	RP11-458F8.4
HMGA1	hsa-miR-16-5p	STAG3L5P-PVRIG2P-PILRB
HMGA1	hsa-miR-15a-5p	STAG3L5P-PVRIG2P-PILRB
HMOX1	hsa-miR-196a-5p	TRG-AS1
HSPB2	hsa-miR-17-5p	RP11-399O19.9
HSPD1	hsa-miR-1-3p	UCA1
IARS	hsa-miR-96-5p	GAS5
IGF1	hsa-miR-27a-3p	AC010226.4
IGF1	hsa-miR-27a-3p	RP11-284N8.3
IL10	hsa-miR-106a-5p	RP11-399O19.9
IL6R	hsa-miR-23a-3p	LINC00641
IL6R	hsa-miR-23a-3p	MAGI2-AS3
IL6R	hsa-miR-23a-3p	RP11-284N8.3
IL6R	hsa-miR-23a-3p	RP11-545I5.3
ITGB3	hsa-let-7a-5p	RP11-834C11.4
JPH2	hsa-miR-24-3p	RP11-6O2.3
KAT2B	hsa-miR-19b-3p	RP11-284N8.3
KAT2B	hsa-miR-17-5p	RP11-399O19.9
KIF20B	hsa-miR-192-5p	RP11-29G8.3
KIT	hsa-miR-20a-5p	RP11-399O19.9
LIMK1	hsa-miR-17-5p	RP13-942N8.1
LPAR1	hsa-miR-23a-3p	LINC00641
LPAR1	hsa-miR-23a-3p	MAGI2-AS3
LPAR1	hsa-miR-23a-3p	RP11-284N8.3
LPAR1	hsa-miR-23a-3p	RP11-545I5.3
MEIS1	hsa-miR-101-3p	ATP2B1-AS1
MEIS1	hsa-miR-101-3p	PWAR6
MEOX2	hsa-miR-130a-3p	MAGI2-AS3
MITF	hsa-miR-101-3p	ATP2B1-AS1
MITF	hsa-miR-101-3p	PWAR6
MT2A	hsa-miR-23a-3p	MAGI2-AS3
MT2A	hsa-miR-23a-3p	RP11-284N8.3
MXD1	hsa-miR-19b-3p	RP11-284N8.3
MXI1	hsa-miR-24-3p	RP11-6O2.3
MYC	hsa-miR-26a-5p	RP11-305E6.4
MYC	hsa-let-7a-5p	RP11-458F8.4
MYC	hsa-let-7g-5p	RP11-458F8.4
MYC	hsa-miR-17-5p	RP13-942N8.1
MYOCD	hsa-miR-1-3p	LINC01197
NOTCH3	hsa-miR-1-3p	LINC01197
NPAS3	hsa-miR-17-5p	MALAT1
NPAS3	hsa-miR-17-5p	PWAR6
NPAS3	hsa-miR-17-5p	RP11-399O19.9
NRP2	hsa-miR-196a-5p	TRG-AS1
PDGFRA	hsa-miR-130b-3p	MAGI2-AS3
PHLPP2	hsa-miR-20a-5p	RP11-399O19.9
PIK3CG	hsa-miR-27a-3p	AC010226.4
PIK3CG	hsa-miR-27a-3p	RP11-284N8.3
PPARGC1A	hsa-miR-23a-3p	LINC00641
PPARGC1A	hsa-miR-23a-3p	RP11-284N8.3
PPARGC1A	hsa-miR-23a-3p	RP11-545I5.3
PRKG1	hsa-miR-20a-5p	RP11-399O19.9
PROX1	hsa-miR-181a-5p	LINC-PINT
PTGER4	hsa-miR-101-3p	ATP2B1-AS1
PTPRO	hsa-miR-17-5p	RP13-942N8.1
RAVER2	hsa-let-7a-5p	TRG-AS1
RBL1	hsa-miR-17-5p	RP13-942N8.1
RCBTB1	hsa-miR-26a-5p	GAS5
RCBTB1	hsa-miR-26a-5p	LINC-PINT
RCBTB1	hsa-miR-26a-5p	RP11-305E6.4
RECK	hsa-miR-15a-5p	LINC00641
RECK	hsa-miR-16-5p	LINC00641
RECK	hsa-miR-15b-5p	LINC00641
SALL4	hsa-miR-107	STAG3L5P-PVRIG2P-PILRB
SEMA6A	hsa-miR-27a-3p	AC010226.4
SEMA6A	hsa-miR-27a-3p	RP11-284N8.3
SLC8A1	hsa-miR-1-3p	LINC01197
SNCG	hsa-miR-107	RP11-588K22.2
SNCG	hsa-miR-107	RP11-798M19.6
SOX5	hsa-miR-132-3p	LINC00641
SOX5	hsa-miR-15a-5p	LINC00641
SOX5	hsa-miR-16-5p	LINC00641
THRB	hsa-miR-27a-3p	AC010226.4
THRB	hsa-miR-27a-3p	RP11-284N8.3
TKT	hsa-miR-1-3p	UCA1
TNFRSF10B	hsa-let-7b-5p	RP11-458F8.4
TNFRSF10B	hsa-let-7a-5p	RP11-458F8.4
TNFRSF10B	hsa-let-7g-5p	RP11-458F8.4
TNFSF12	hsa-miR-17-5p	RP11-399O19.9
TP53INP1	hsa-miR-130b-3p	MAGI2-AS3
TP53INP1	hsa-miR-17-5p	PWAR6
TP53INP1	hsa-miR-17-5p	RP11-399O19.9
TP53INP1	hsa-miR-20a-5p	RP11-399O19.9
TRIB3	hsa-miR-96-5p	GAS5
UBE2C	hsa-miR-17-5p	RP13-942N8.1
VDR	hsa-let-7a-5p	RP11-834C11.4
VDR	hsa-let-7a-5p	TRG-AS1
VEGFA	hsa-miR-15b-5p	RP11-2C24.4
VEGFA	hsa-miR-15a-5p	RP11-2C24.4
VEGFA	hsa-miR-17-5p	RP13-942N8.1
VEGFA	hsa-miR-16-5p	STAG3L5P-PVRIG2P-PILRB
VEGFA	hsa-miR-15a-5p	STAG3L5P-PVRIG2P-PILRB
VEGFA	hsa-miR-15b-5p	STAG3L5P-PVRIG2P-PILRB
VEGFA	hsa-miR-107	STAG3L5P-PVRIG2P-PILRB
ZEB1	hsa-miR-101-3p	ATP2B1-AS1
ZEB1	hsa-miR-130b-3p	MAGI2-AS3
ZEB1	hsa-miR-101-3p	PWAR6
ZEB2	hsa-miR-101-3p	ATP2B1-AS1
ZEB2	hsa-miR-101-3p	PWAR6
