# Supplementary material for: Long Noncoding RNA Expression Signatures of Colon Cancer Based on the ceRNA Network and Their Prognostic Value
Source: Dis Markers. 2019 Mar 11;2019:7636757. doi: 10.1155/2019/7636757 (PMC6432706; doi:10.1155/2019/7636757)
Supplement: Supplementary 4 — Doc S3: GO enrichment analysis of the ceRNA network. [file 7636757.f4.xlsx]

## Sheet: GO
ID	Description	GeneRatio	pvalue	p.adjust	geneID
GO:0070482	response to oxygen levels	20/96	7.5147e-15	2.3769e-11	BCL2/CDK4/CCNA2/MYC/E2F1/CDKN1A/VEGFA/DNMT3B/CXCL12/CAV1/HSPD1/HMOX1/FAS/PPARGC1A/SLC8A1/EPAS1/LPAR1/MYOCD/BMP2/CPEB1
GO:0071900	regulation of protein serine/threonine kinase activity	22/96	1.54619e-14	2.4453e-11	ZEB2/CCNA2/EZH2/CDC25A/CCND1/CDKN1A/VEGFA/CDC6/KIT/CAV1/FGFR1/TRIB3/PROX1/KAT2B/IGF1/PIK3CG/LPAR1/MYOCD/CKS2/CDC25C/BMP2/TNFRSF10B
GO:0030335	positive regulation of cell migration	19/96	6.48872e-13	5.14758e-10	BCL2/ITGB3/VEGFA/CXCL12/KIT/FGFR1/FGF7/PROX1/CSF1/KIF20B/PDGFRA/IL6R/IGF1/CCR7/SLC8A1/LPAR1/NRP2/BMP2/CPEB1
GO:0050673	epithelial cell proliferation	18/96	6.50975e-13	5.14758e-10	MYC/CCND1/ESR1/ITGB3/VEGFA/VDR/CXCL12/KIT/CAV1/FGF7/PROX1/TNFSF12/HMOX1/IL10/IGF1/FGF9/NRP2/BMP2
GO:2000147	positive regulation of cell motility	19/96	1.25367e-12	7.93071e-10	BCL2/ITGB3/VEGFA/CXCL12/KIT/FGFR1/FGF7/PROX1/CSF1/KIF20B/PDGFRA/IL6R/IGF1/CCR7/SLC8A1/LPAR1/NRP2/BMP2/CPEB1
GO:0051272	positive regulation of cellular component movement	19/96	1.91593e-12	1.01002e-09	BCL2/ITGB3/VEGFA/CXCL12/KIT/FGFR1/FGF7/PROX1/CSF1/KIF20B/PDGFRA/IL6R/IGF1/CCR7/SLC8A1/LPAR1/NRP2/BMP2/CPEB1
GO:0040017	positive regulation of locomotion	19/96	3.99714e-12	1.80613e-09	BCL2/ITGB3/VEGFA/CXCL12/KIT/FGFR1/FGF7/PROX1/CSF1/KIF20B/PDGFRA/IL6R/IGF1/CCR7/SLC8A1/LPAR1/NRP2/BMP2/CPEB1
GO:0050679	positive regulation of epithelial cell proliferation	13/96	6.22841e-12	2.30479e-09	MYC/CCND1/ITGB3/VEGFA/CXCL12/FGF7/PROX1/TNFSF12/IL10/IGF1/FGF9/NRP2/BMP2
GO:0045787	positive regulation of cell cycle	17/96	6.91383e-12	2.30479e-09	CDK4/AURKB/CCND1/E2F1/CDKN1A/CHEK1/CDC6/BCL2L11/BRCA1/FGFR1/PROX1/KIF20B/IL10/IGF1/UBE2C/CKS2/CDC25C
GO:0071453	cellular response to oxygen levels	14/96	7.28673e-12	2.30479e-09	BCL2/CCNA2/MYC/E2F1/VEGFA/DNMT3B/CAV1/HMOX1/FAS/PPARGC1A/SLC8A1/EPAS1/LPAR1/CPEB1
GO:0048146	positive regulation of fibroblast proliferation	9/96	1.2042e-11	3.46262e-09	CDK4/CCNA2/MYC/E2F1/CDKN1A/ESR1/CDC6/PDGFRA/IGF1
GO:0000079	regulation of cyclin-dependent protein serine/threonine kinase activity	10/96	3.55162e-11	9.36148e-09	CCNA2/CDC25A/CCND1/CDKN1A/CDC6/PROX1/KAT2B/MYOCD/CKS2/CDC25C
GO:0048145	regulation of fibroblast proliferation	10/96	4.01299e-11	9.76391e-09	TP53INP1/CDK4/CCNA2/MYC/E2F1/CDKN1A/ESR1/CDC6/PDGFRA/IGF1
GO:0048144	fibroblast proliferation	10/96	4.52709e-11	1.00804e-08	TP53INP1/CDK4/CCNA2/MYC/E2F1/CDKN1A/ESR1/CDC6/PDGFRA/IGF1
GO:0001666	response to hypoxia	16/96	5.07066e-11	1.00804e-08	BCL2/CCNA2/MYC/E2F1/VEGFA/DNMT3B/CXCL12/CAV1/HSPD1/HMOX1/PPARGC1A/SLC8A1/EPAS1/MYOCD/BMP2/CPEB1
GO:1904029	regulation of cyclin-dependent protein kinase activity	10/96	5.09915e-11	1.00804e-08	CCNA2/CDC25A/CCND1/CDKN1A/CDC6/PROX1/KAT2B/MYOCD/CKS2/CDC25C
GO:0050769	positive regulation of neurogenesis	17/96	6.20896e-11	1.15523e-08	ZEB2/BCL2/EZH2/ZEB1/VEGFA/DNMT3B/CXCL12/KIT/FGFR1/PROX1/CSF1/KIF20B/CPEB3/LPAR1/LIMK1/BMP2/CPEB1
GO:0010720	positive regulation of cell development	18/96	6.67854e-11	1.17357e-08	ZEB2/BCL2/EZH2/ZEB1/VEGFA/DNMT3B/CXCL12/KIT/FGFR1/PROX1/CSF1/KIF20B/CPEB3/IGF1/LPAR1/LIMK1/BMP2/CPEB1
GO:0036293	response to decreased oxygen levels	16/96	7.22256e-11	1.20237e-08	BCL2/CCNA2/MYC/E2F1/VEGFA/DNMT3B/CXCL12/CAV1/HSPD1/HMOX1/PPARGC1A/SLC8A1/EPAS1/MYOCD/BMP2/CPEB1
GO:0050678	regulation of epithelial cell proliferation	15/96	7.62924e-11	1.20656e-08	MYC/CCND1/ITGB3/VEGFA/VDR/CXCL12/CAV1/FGF7/PROX1/TNFSF12/IL10/IGF1/FGF9/NRP2/BMP2
GO:0045860	positive regulation of protein kinase activity	18/96	1.6003e-10	2.3326e-08	ZEB2/EZH2/CCND1/CDKN1A/ITGB3/VEGFA/CDC6/KIT/FGFR1/PROX1/CSF1/IGF1/CCR7/PIK3CG/LPAR1/CKS2/BMP2/TNFRSF10B
GO:0048732	gland development	17/96	1.62242e-10	2.3326e-08	BCL2/EZH2/CCND1/ESR1/VEGFA/VDR/BCL2L11/HAND2/CAV1/FGFR1/FGF7/PROX1/CSF1/HMOX1/IL10/CYP19A1/BMP2
GO:0010463	mesenchymal cell proliferation	8/96	2.02399e-10	2.78343e-08	MYC/ZEB1/VEGFA/HAND2/FGFR1/FGF7/FGF9/BMP2
GO:0048514	blood vessel morphogenesis	18/96	2.55191e-10	3.3632e-08	MEIS1/NOTCH3/ITGB3/VEGFA/HAND2/BRCA1/CAV1/FGFR1/MEOX2/PROX1/TNFSF12/HMOX1/PDGFRA/PIK3CG/FGF9/EPAS1/NRP2/MYOCD
GO:0051962	positive regulation of nervous system development	17/96	5.79447e-10	7.29066e-08	ZEB2/BCL2/EZH2/ZEB1/VEGFA/DNMT3B/CXCL12/KIT/FGFR1/PROX1/CSF1/KIF20B/CPEB3/LPAR1/LIMK1/BMP2/CPEB1
GO:0050900	leukocyte migration	17/96	5.99295e-10	7.29066e-08	COL1A2/ITGB3/VEGFA/PTPRO/CXCL12/KIT/MITF/CAV1/CSF1/HMOX1/IL10/IL6R/CYP19A1/CCR7/PIK3CG/PTGER4/TNFRSF10B
GO:0001935	endothelial cell proliferation	10/96	7.8926e-10	9.24604e-08	ITGB3/VEGFA/CXCL12/CAV1/PROX1/TNFSF12/HMOX1/IL10/NRP2/BMP2
GO:0035239	tube morphogenesis	15/96	9.3277e-10	1.0537e-07	ZEB2/BCL2/MYC/ZEB1/ESR1/VEGFA/VDR/BCL2L11/HAND2/PROX1/CSF1/KIF20B/PDGFRA/BMP2/SALL4
GO:0001525	angiogenesis	16/96	1.16077e-09	1.26604e-07	MEIS1/NOTCH3/ITGB3/VEGFA/HAND2/BRCA1/CAV1/FGFR1/MEOX2/TNFSF12/HMOX1/PDGFRA/PIK3CG/FGF9/EPAS1/NRP2
GO:0071902	positive regulation of protein serine/threonine kinase activity	14/96	1.50392e-09	1.54519e-07	ZEB2/EZH2/CCND1/VEGFA/CDC6/KIT/FGFR1/PROX1/IGF1/PIK3CG/LPAR1/CKS2/BMP2/TNFRSF10B
GO:0060326	cell chemotaxis	13/96	1.51441e-09	1.54519e-07	VEGFA/PTPRO/CXCL12/KIT/FGFR1/CSF1/PDGFRA/IL10/IL6R/CYP19A1/CCR7/PIK3CG/LPAR1
GO:0097529	myeloid leukocyte migration	11/96	2.38895e-09	2.36133e-07	VEGFA/PTPRO/CXCL12/KIT/MITF/CSF1/IL6R/CYP19A1/CCR7/PIK3CG/PTGER4
GO:0045666	positive regulation of neuron differentiation	14/96	2.92541e-09	2.80396e-07	ZEB2/BCL2/EZH2/ZEB1/VEGFA/DNMT3B/CXCL12/FGFR1/PROX1/CPEB3/LPAR1/LIMK1/BMP2/CPEB1
GO:0001936	regulation of endothelial cell proliferation	9/96	3.7992e-09	3.53438e-07	ITGB3/VEGFA/CXCL12/CAV1/PROX1/TNFSF12/IL10/NRP2/BMP2
GO:0001938	positive regulation of endothelial cell proliferation	8/96	5.46435e-09	4.92521e-07	ITGB3/VEGFA/CXCL12/PROX1/TNFSF12/IL10/NRP2/BMP2
GO:0061138	morphogenesis of a branching epithelium	11/96	5.60568e-09	4.92521e-07	BCL2/MYC/ESR1/VEGFA/VDR/FGFR1/FGF7/PROX1/CSF1/IL10/BMP2
GO:0019216	regulation of lipid metabolic process	13/96	6.49288e-09	5.55053e-07	CDK4/VDR/KIT/BRCA1/CAV1/TRIB3/PROX1/PDGFRA/RBL1/PPARGC1A/CCR7/PIK3CG/BMP2
GO:0060537	muscle tissue development	14/96	1.03057e-08	8.57815e-07	BCL2/VEGFA/CAV1/FGFR1/MEOX2/PROX1/PDGFRA/PPARGC1A/IGF1/SLC8A1/FGF9/MYOCD/BMP2/JPH2
GO:0001763	morphogenesis of a branching structure	11/96	1.16143e-08	9.32504e-07	BCL2/MYC/ESR1/VEGFA/VDR/FGFR1/FGF7/PROX1/CSF1/IL10/BMP2
GO:0031100	animal organ regeneration	8/96	1.17927e-08	9.32504e-07	CDK4/CCNA2/EZH2/CCND1/CDKN1A/CXCL12/HMOX1/IL10
GO:0090068	positive regulation of cell cycle process	12/96	1.65461e-08	1.27647e-06	CDK4/AURKB/CCND1/E2F1/CDKN1A/CDC6/BRCA1/FGFR1/KIF20B/IGF1/UBE2C/CDC25C
GO:0044843	cell cycle G1/S phase transition	12/96	1.97372e-08	1.4864e-06	BCL2/CDK4/CCNA2/MYC/EZH2/CDC25A/CCND1/E2F1/CCNE1/CDKN1A/CDC6/CDC25C
GO:0001655	urogenital system development	13/96	2.42345e-08	1.78264e-06	BCL2/MYC/NOTCH3/ESR1/VEGFA/PTPRO/BCL2L11/FGFR1/PROX1/PDGFRA/CYP19A1/MYOCD/BMP2
GO:0048545	response to steroid hormone	14/96	3.08808e-08	2.21991e-06	BCL2/CCND1/CCNE1/CDKN1A/ESR1/DNMT3B/VDR/BRCA1/CAV1/HSPD1/IL10/THRB/FAS/PPARGC1A
GO:0097191	extrinsic apoptotic signaling pathway	11/96	3.22093e-08	2.26395e-06	BCL2/BCL2L11/BRCA1/CAV1/FGFR1/TNFSF12/HMOX1/IL6R/FAS/IGF1/TNFRSF10B
GO:0050920	regulation of chemotaxis	10/96	4.62924e-08	3.18311e-06	VEGFA/PTPRO/CXCL12/FGFR1/CSF1/PDGFRA/IL6R/CYP19A1/CCR7/LPAR1
GO:0031099	regeneration	10/96	4.89058e-08	3.29125e-06	BCL2/CDK4/CCNA2/EZH2/CCND1/CDKN1A/CXCL12/HMOX1/IL10/IGF1
GO:0014706	striated muscle tissue development	13/96	5.35704e-08	3.53006e-06	BCL2/VEGFA/CAV1/FGFR1/MEOX2/PROX1/PDGFRA/IGF1/SLC8A1/FGF9/MYOCD/BMP2/JPH2
GO:0036296	response to increased oxygen levels	5/96	5.65903e-08	3.5799e-06	CDK4/CDKN1A/DNMT3B/CAV1/FAS
GO:0055093	response to hyperoxia	5/96	5.65903e-08	3.5799e-06	CDK4/CDKN1A/DNMT3B/CAV1/FAS
GO:0048872	homeostasis of number of cells	11/96	6.46587e-08	4.01011e-06	BCL2/EZH2/VEGFA/BCL2L11/KIT/AKT3/CSF1/HMOX1/FAS/CCR7/EPAS1
GO:0033044	regulation of chromosome organization	12/96	7.86477e-08	4.78389e-06	HMGA1/AURKB/MYC/CHEK1/VEGFA/DNMT3B/CDC6/AXIN2/BRCA1/PPARGC1A/MYOCD/UBE2C
GO:0048738	cardiac muscle tissue development	10/96	9.68515e-08	5.67299e-06	VEGFA/FGFR1/PROX1/PDGFRA/IGF1/SLC8A1/FGF9/MYOCD/BMP2/JPH2
GO:0071456	cellular response to hypoxia	10/96	9.68515e-08	5.67299e-06	BCL2/CCNA2/MYC/E2F1/VEGFA/HMOX1/PPARGC1A/SLC8A1/EPAS1/CPEB1
GO:0000082	G1/S transition of mitotic cell cycle	11/96	1.13574e-07	6.46932e-06	BCL2/CDK4/MYC/EZH2/CDC25A/CCND1/E2F1/CCNE1/CDKN1A/CDC6/CDC25C
GO:0035265	organ growth	9/96	1.14538e-07	6.46932e-06	BCL2/ESR1/BCL2L11/FGFR1/FGF7/PROX1/IGF1/CYP19A1/FGF9
GO:0030900	forebrain development	13/96	1.19205e-07	6.61483e-06	ZEB2/EZH2/E2F1/NOTCH3/CXCL12/FGFR1/PROX1/PPARGC1A/SLC8A1/LPAR1/PHLPP2/BMP2/PRKG1
GO:0051271	negative regulation of cellular component movement	11/96	1.23478e-07	6.65828e-06	TP53INP1/BCL2/RECK/PTPRO/CXCL12/MEOX2/HMOX1/PPARGC1A/CYP19A1/MYOCD/PTGER4
GO:0030595	leukocyte chemotaxis	10/96	1.24198e-07	6.65828e-06	VEGFA/PTPRO/CXCL12/KIT/CSF1/IL10/IL6R/CYP19A1/CCR7/PIK3CG
GO:0036294	cellular response to decreased oxygen levels	10/96	1.36909e-07	7.21741e-06	BCL2/CCNA2/MYC/E2F1/VEGFA/HMOX1/PPARGC1A/SLC8A1/EPAS1/CPEB1
GO:2001233	regulation of apoptotic signaling pathway	13/96	1.63377e-07	8.47148e-06	TP53INP1/BCL2/E2F1/BCL2L11/CXCL12/BRCA1/CAV1/FGFR1/TNFSF12/HMOX1/FAS/IGF1/TNFRSF10B
GO:0060562	epithelial tube morphogenesis	12/96	1.68805e-07	8.61177e-06	ZEB2/BCL2/MYC/ESR1/VEGFA/VDR/HAND2/PROX1/CSF1/KIF20B/BMP2/SALL4
GO:0001667	ameboidal-type cell migration	12/96	2.14891e-07	1.05631e-05	ZEB2/ITGB3/VEGFA/KIT/HAND2/FGFR1/FGF7/MEOX2/PROX1/TNFSF12/SLC8A1/NRP2
GO:2001236	regulation of extrinsic apoptotic signaling pathway	9/96	2.16094e-07	1.05631e-05	BCL2/BRCA1/CAV1/FGFR1/TNFSF12/HMOX1/FAS/IGF1/TNFRSF10B
GO:0040013	negative regulation of locomotion	11/96	2.17072e-07	1.05631e-05	TP53INP1/BCL2/RECK/PTPRO/CXCL12/MEOX2/HMOX1/PPARGC1A/CYP19A1/MYOCD/PTGER4
GO:0048639	positive regulation of developmental growth	9/96	2.83664e-07	1.35944e-05	BCL2/VEGFA/CXCL12/FGFR1/PROX1/CSF1/IGF1/FGF9/LIMK1
GO:0030336	negative regulation of cell migration	10/96	3.57332e-07	1.68429e-05	TP53INP1/BCL2/RECK/CXCL12/MEOX2/HMOX1/PPARGC1A/CYP19A1/MYOCD/PTGER4
GO:1901861	regulation of muscle tissue development	8/96	3.62099e-07	1.68429e-05	BCL2/FGFR1/PPARGC1A/IGF1/FGF9/MYOCD/BMP2/JPH2
GO:0022612	gland morphogenesis	8/96	3.86178e-07	1.77026e-05	BCL2/ESR1/VDR/CAV1/FGFR1/FGF7/PROX1/CSF1
GO:0033002	muscle cell proliferation	9/96	4.08737e-07	1.83372e-05	NOTCH3/FGFR1/HMOX1/IL10/IL6R/PPARGC1A/IGF1/FGF9/MYOCD
GO:0035051	cardiocyte differentiation	8/96	4.11615e-07	1.83372e-05	VEGFA/HAND2/PROX1/PDGFRA/IGF1/SLC8A1/MYOCD/BMP2
GO:0072001	renal system development	11/96	5.10219e-07	2.24142e-05	BCL2/MYC/NOTCH3/VEGFA/PTPRO/BCL2L11/FGFR1/PROX1/PDGFRA/MYOCD/BMP2
GO:0097193	intrinsic apoptotic signaling pathway	11/96	5.28557e-07	2.29017e-05	BCL2/E2F1/CDKN1A/BCL2L11/CXCL12/BRCA1/CAV1/TRIB3/HMOX1/DYRK2/TNFRSF10B
GO:0001501	skeletal system development	14/96	5.55384e-07	2.37389e-05	MEIS1/ZEB1/COL1A2/SOX5/VDR/AXIN2/KIT/HAND2/FGFR1/PDGFRA/IGF1/FGF9/BMP2/PTGER4
GO:0006875	cellular metal ion homeostasis	14/96	5.9789e-07	2.5215e-05	BCL2/MYC/ESR1/VDR/CXCL12/CAV1/HMOX1/PDGFRA/CCR7/PIK3CG/SLC8A1/LPAR1/MT2A/JPH2
GO:0048638	regulation of developmental growth	11/96	6.07868e-07	2.52985e-05	BCL2/CDK4/VEGFA/BCL2L11/CXCL12/FGFR1/PROX1/CSF1/IGF1/FGF9/LIMK1
GO:0009411	response to UV	8/96	6.33279e-07	2.56095e-05	TP53INP1/BCL2/AURKB/MYC/CDC25A/CCND1/CDKN1A/CHEK1
GO:0000302	response to reactive oxygen species	10/96	6.39631e-07	2.56095e-05	BCL2/CCNA2/EZH2/HSPD1/HMOX1/PDGFRA/GPX2/PPARGC1A/CCR7/SLC8A1
GO:2000146	negative regulation of cell motility	10/96	6.39631e-07	2.56095e-05	TP53INP1/BCL2/RECK/CXCL12/MEOX2/HMOX1/PPARGC1A/CYP19A1/MYOCD/PTGER4
GO:0048608	reproductive structure development	13/96	6.88972e-07	2.70534e-05	BCL2/CCND1/ESR1/VEGFA/VDR/BCL2L11/KIT/PDGFRA/IL10/CYP19A1/FGF9/EPAS1/MYOCD
GO:0010631	epithelial cell migration	10/96	6.92799e-07	2.70534e-05	ZEB2/ITGB3/VEGFA/KIT/FGFR1/FGF7/MEOX2/PROX1/TNFSF12/NRP2
GO:0061458	reproductive system development	13/96	7.46234e-07	2.87846e-05	BCL2/CCND1/ESR1/VEGFA/VDR/BCL2L11/KIT/PDGFRA/IL10/CYP19A1/FGF9/EPAS1/MYOCD
GO:0030879	mammary gland development	8/96	7.55685e-07	2.8798e-05	CCND1/ESR1/VEGFA/VDR/BCL2L11/CAV1/CSF1/CYP19A1
GO:0090132	epithelium migration	10/96	7.79804e-07	2.93633e-05	ZEB2/ITGB3/VEGFA/KIT/FGFR1/FGF7/MEOX2/PROX1/TNFSF12/NRP2
GO:0061448	connective tissue development	10/96	8.76222e-07	3.26058e-05	CDK4/ZEB1/SOX5/AXIN2/HAND2/FGFR1/CSF1/PPARGC1A/FGF9/BMP2
GO:0042692	muscle cell differentiation	12/96	9.12254e-07	3.35518e-05	BCL2/EZH2/ZEB1/VEGFA/KIT/PROX1/PDGFRA/IGF1/SLC8A1/EPAS1/MYOCD/BMP2
GO:0030278	regulation of ossification	9/96	9.70982e-07	3.53013e-05	BCL2/AXIN2/HAND2/CSF1/IL6R/IGF1/SLC8A1/BMP2/PTGER4
GO:0090130	tissue migration	10/96	9.82909e-07	3.53289e-05	ZEB2/ITGB3/VEGFA/KIT/FGFR1/FGF7/MEOX2/PROX1/TNFSF12/NRP2
GO:0008630	intrinsic apoptotic signaling pathway in response to DNA damage	7/96	1.2498e-06	4.34936e-05	E2F1/CDKN1A/BCL2L11/CXCL12/BRCA1/HMOX1/DYRK2
GO:0055007	cardiac muscle cell differentiation	7/96	1.2498e-06	4.34936e-05	VEGFA/PROX1/PDGFRA/IGF1/SLC8A1/MYOCD/BMP2
GO:0043279	response to alkaloid	8/96	1.25132e-06	4.34936e-05	BCL2/CCNA2/DNMT3B/HSPD1/HMOX1/PPARGC1A/SLC8A1/CASP7
GO:0007050	cell cycle arrest	10/96	1.27705e-06	4.39056e-05	TP53INP1/CDK4/MYC/CCND1/E2F1/CDKN1A/BRCA1/KAT2B/KIF20B/CDC25C
GO:0051052	regulation of DNA metabolic process	12/96	1.35773e-06	4.61775e-05	AURKB/MYC/CDKN1A/CHEK1/CDC6/AXIN2/BRCA1/FGFR1/PDGFRA/IL10/PPARGC1A/IGF1
GO:2000027	regulation of organ morphogenesis	10/96	1.37408e-06	4.62365e-05	BCL2/MYC/ESR1/VEGFA/VDR/HAND2/FGFR1/FGF7/CSF1/BMP2
GO:0010464	regulation of mesenchymal cell proliferation	5/96	1.47093e-06	4.8464e-05	MYC/ZEB1/VEGFA/FGFR1/FGF9
GO:0010863	positive regulation of phospholipase C activity	5/96	1.47093e-06	4.8464e-05	ESR1/KIT/FGFR1/PDGFRA/LPAR1
GO:0014909	smooth muscle cell migration	6/96	1.59866e-06	5.15974e-05	BCL2/ITGB3/PPARGC1A/IGF1/LPAR1/MYOCD
GO:1901863	positive regulation of muscle tissue development	6/96	1.59866e-06	5.15974e-05	BCL2/FGFR1/PPARGC1A/IGF1/FGF9/MYOCD
GO:0048511	rhythmic process	11/96	1.62131e-06	5.18002e-05	BCL2/CDK4/EZH2/ESR1/VEGFA/KIT/PROX1/KAT2B/PDGFRA/FAS/PPARGC1A
GO:0048070	regulation of developmental pigmentation	4/96	1.65288e-06	5.22806e-05	ZEB2/BCL2/BCL2L11/KIT
GO:1904031	positive regulation of cyclin-dependent protein kinase activity	5/96	1.70057e-06	5.32564e-05	CCND1/CDKN1A/CDC6/PROX1/CKS2
GO:0031346	positive regulation of cell projection organization	11/96	1.77769e-06	5.51258e-05	ZEB2/EZH2/VEGFA/CXCL12/KIT/FGFR1/CPEB3/CCR7/LPAR1/LIMK1/CPEB1
GO:0055024	regulation of cardiac muscle tissue development	6/96	1.91984e-06	5.8956e-05	FGFR1/IGF1/FGF9/MYOCD/BMP2/JPH2
GO:0051098	regulation of binding	11/96	1.94718e-06	5.89681e-05	BCL2/AURKB/E2F1/HAND2/CAV1/TRIB3/HMOX1/IL10/IGF1/MYOCD/BMP2
GO:1900274	regulation of phospholipase C activity	5/96	1.95752e-06	5.89681e-05	ESR1/KIT/FGFR1/PDGFRA/LPAR1
GO:0032103	positive regulation of response to external stimulus	10/96	2.17672e-06	6.4891e-05	VEGFA/CXCL12/FGFR1/HSPD1/CSF1/IL6R/CCR7/PIK3CG/LPAR1/PTGER4
GO:0043405	regulation of MAP kinase activity	11/96	2.19517e-06	6.4891e-05	ZEB2/EZH2/VEGFA/KIT/CAV1/FGFR1/TRIB3/IGF1/PIK3CG/LPAR1/BMP2
GO:0001822	kidney development	10/96	2.49445e-06	7.30552e-05	BCL2/MYC/NOTCH3/VEGFA/PTPRO/BCL2L11/FGFR1/PROX1/PDGFRA/BMP2
GO:0043410	positive regulation of MAPK cascade	13/96	2.63557e-06	7.64798e-05	ZEB2/EZH2/VEGFA/KIT/HAND2/FGFR1/PDGFRA/IGF1/CCR7/PIK3CG/FGF9/LPAR1/BMP2
GO:0034644	cellular response to UV	6/96	2.95831e-06	8.5065e-05	TP53INP1/AURKB/MYC/CDC25A/CDKN1A/CHEK1
GO:0010948	negative regulation of cell cycle process	10/96	3.04666e-06	8.6816e-05	BCL2/CDK4/AURKB/EZH2/CCND1/E2F1/CDKN1A/CHEK1/BRCA1/CDC25C
GO:0002685	regulation of leukocyte migration	8/96	3.10313e-06	8.76357e-05	VEGFA/CXCL12/CSF1/HMOX1/IL6R/CYP19A1/CCR7/PTGER4
GO:0048661	positive regulation of smooth muscle cell proliferation	6/96	3.21264e-06	8.99255e-05	NOTCH3/HMOX1/IL10/IL6R/PPARGC1A/IGF1
GO:0006979	response to oxidative stress	12/96	3.24588e-06	9.00589e-05	TP53INP1/BCL2/CCNA2/EZH2/HSPD1/HMOX1/PDGFRA/GPX2/PPARGC1A/CCR7/SLC8A1/EPAS1
GO:0010035	response to inorganic substance	13/96	3.31117e-06	9.10715e-05	BCL2/CDK4/CCNA2/EZH2/CCND1/CAV1/HSPD1/HMOX1/FAS/PPARGC1A/CCR7/SLC8A1/MT2A
GO:0008406	gonad development	9/96	3.38533e-06	9.23085e-05	BCL2/CCND1/ESR1/VEGFA/BCL2L11/KIT/PDGFRA/CYP19A1/FGF9
GO:0048660	regulation of smooth muscle cell proliferation	7/96	3.49161e-06	9.43928e-05	NOTCH3/HMOX1/IL10/IL6R/PPARGC1A/IGF1/MYOCD
GO:0014812	muscle cell migration	6/96	3.77478e-06	9.99875e-05	BCL2/ITGB3/PPARGC1A/IGF1/LPAR1/MYOCD
GO:0043627	response to estrogen	6/96	3.77478e-06	9.99875e-05	CCND1/ESR1/BRCA1/CAV1/HSPD1/HMOX1
GO:0043406	positive regulation of MAP kinase activity	9/96	3.79339e-06	9.99875e-05	ZEB2/EZH2/VEGFA/KIT/FGFR1/IGF1/PIK3CG/LPAR1/BMP2
GO:0044057	regulation of system process	13/96	3.9581e-06	0.000103467	PTPRO/HAND2/CAV1/FGFR1/IL10/THRB/PPARGC1A/IGF1/PIK3CG/SLC8A1/EPAS1/MYOCD/PRKG1
GO:0045137	development of primary sexual characteristics	9/96	4.08834e-06	0.000105995	BCL2/CCND1/ESR1/VEGFA/BCL2L11/KIT/PDGFRA/CYP19A1/FGF9
GO:0048659	smooth muscle cell proliferation	7/96	4.15796e-06	0.000106924	NOTCH3/HMOX1/IL10/IL6R/PPARGC1A/IGF1/MYOCD
GO:0051147	regulation of muscle cell differentiation	8/96	4.28322e-06	0.000109257	BCL2/EZH2/ZEB1/KIT/PROX1/IGF1/MYOCD/BMP2
GO:0016202	regulation of striated muscle tissue development	7/96	4.40234e-06	0.000110524	BCL2/FGFR1/IGF1/FGF9/MYOCD/BMP2/JPH2
GO:0000075	cell cycle checkpoint	9/96	4.40279e-06	0.000110524	AURKB/CCND1/E2F1/CDKN1A/CHEK1/CDC6/BRCA1/PROX1/CDC25C
GO:0007507	heart development	13/96	4.51451e-06	0.000112436	VEGFA/AXIN2/HAND2/FGFR1/PROX1/PDGFRA/IGF1/SLC8A1/FGF9/MYOCD/BMP2/JPH2/SALL4
GO:0048066	developmental pigmentation	5/96	5.2943e-06	0.000130827	ZEB2/BCL2/BCL2L11/KIT/MITF
GO:0009314	response to radiation	12/96	5.67686e-06	0.000139193	TP53INP1/BCL2/AURKB/MYC/CDC25A/CCND1/CDKN1A/CHEK1/DNMT3B/CXCL12/KIT/BRCA1
GO:0006260	DNA replication	10/96	5.72708e-06	0.000139344	HMGA1/CDC25A/CCNE1/CHEK1/CDC6/BRCA1/FGFR1/PDGFRA/IGF1/CDC25C
GO:0048634	regulation of muscle organ development	7/96	5.8112e-06	0.00013955	BCL2/FGFR1/IGF1/FGF9/MYOCD/BMP2/JPH2
GO:0030324	lung development	8/96	5.82379e-06	0.00013955	VEGFA/FGFR1/FGF7/PROX1/THRB/FGF9/EPAS1/MYOCD
GO:2000378	negative regulation of reactive oxygen species metabolic process	5/96	5.91351e-06	0.000140635	BCL2/BRCA1/CAV1/HSPD1/IL10
GO:0030323	respiratory tube development	8/96	6.89807e-06	0.000161619	VEGFA/FGFR1/FGF7/PROX1/THRB/FGF9/EPAS1/MYOCD
GO:2001235	positive regulation of apoptotic signaling pathway	8/96	6.89807e-06	0.000161619	TP53INP1/BCL2/E2F1/BCL2L11/CAV1/TNFSF12/FAS/TNFRSF10B
GO:0018108	peptidyl-tyrosine phosphorylation	11/96	7.01906e-06	0.000163245	ITGB3/VEGFA/KIT/CAV1/FGFR1/FGF7/PDGFRA/IL6R/IGF1/FGF9/DYRK2
GO:0032355	response to estradiol	7/96	7.19185e-06	0.000166043	CCNA2/EZH2/CCND1/ESR1/DNMT3B/IL10/PPARGC1A
GO:0018212	peptidyl-tyrosine modification	11/96	7.38894e-06	0.000169357	ITGB3/VEGFA/KIT/CAV1/FGFR1/FGF7/PDGFRA/IL6R/IGF1/FGF9/DYRK2
GO:0010976	positive regulation of neuron projection development	9/96	7.49721e-06	0.000170602	ZEB2/EZH2/VEGFA/CXCL12/FGFR1/CPEB3/LPAR1/LIMK1/CPEB1
GO:0050921	positive regulation of chemotaxis	7/96	7.57658e-06	0.000171177	VEGFA/CXCL12/FGFR1/CSF1/IL6R/CCR7/LPAR1
GO:0051781	positive regulation of cell division	6/96	7.91537e-06	0.000177502	AURKB/VEGFA/CDC6/FGF7/KIF20B/FGF9
GO:0045931	positive regulation of mitotic cell cycle	7/96	7.97826e-06	0.000177502	CDK4/CCND1/CDC6/FGFR1/KIF20B/IGF1/UBE2C
GO:0060485	mesenchyme development	9/96	8.0249e-06	0.000177502	ZEB2/BCL2/MYC/EZH2/AXIN2/HAND2/FGFR1/FGF9/BMP2
GO:0001503	ossification	11/96	8.18009e-06	0.000179678	BCL2/AXIN2/HAND2/CSF1/IL6R/IGF1/SLC8A1/FGF9/BMP2/PTGER4/IARS
GO:0010518	positive regulation of phospholipase activity	5/96	8.97887e-06	0.000195863	ESR1/KIT/FGFR1/PDGFRA/LPAR1
GO:0045927	positive regulation of growth	9/96	9.17627e-06	0.000197446	BCL2/VEGFA/CXCL12/FGFR1/PROX1/CSF1/IGF1/FGF9/LIMK1
GO:0051146	striated muscle cell differentiation	9/96	9.17627e-06	0.000197446	BCL2/EZH2/VEGFA/PROX1/PDGFRA/IGF1/SLC8A1/MYOCD/BMP2
GO:0030318	melanocyte differentiation	4/96	9.3215e-06	0.000199216	ZEB2/BCL2/KIT/MITF
GO:0046890	regulation of lipid biosynthetic process	7/96	1.02618e-05	0.000217839	CDK4/VDR/BRCA1/TRIB3/PROX1/PPARGC1A/BMP2
GO:1904019	epithelial cell apoptotic process	6/96	1.10622e-05	0.000233264	E2F1/HMOX1/IL10/FAS/PPARGC1A/PIK3CG
GO:0051302	regulation of cell division	7/96	1.13154e-05	0.000237024	AURKB/MYC/VEGFA/CDC6/FGF7/KIF20B/FGF9
GO:1901990	regulation of mitotic cell cycle phase transition	10/96	1.17773e-05	0.000245077	BCL2/CDK4/CCNA2/EZH2/CCND1/E2F1/CDKN1A/CDC6/UBE2C/CDC25C
GO:0051153	regulation of striated muscle cell differentiation	6/96	1.25744e-05	0.000259954	BCL2/EZH2/PROX1/IGF1/MYOCD/BMP2
GO:0006874	cellular calcium ion homeostasis	11/96	1.3034e-05	0.000267705	BCL2/ESR1/VDR/CXCL12/CAV1/PDGFRA/CCR7/PIK3CG/SLC8A1/LPAR1/JPH2
GO:0072006	nephron development	7/96	1.36927e-05	0.000277628	BCL2/MYC/NOTCH3/VEGFA/PTPRO/PDGFRA/BMP2
GO:2000045	regulation of G1/S transition of mitotic cell cycle	7/96	1.36927e-05	0.000277628	BCL2/EZH2/CCND1/E2F1/CDKN1A/CDC6/CDC25C
GO:0008585	female gonad development	6/96	1.42496e-05	0.00028708	BCL2/ESR1/VEGFA/KIT/PDGFRA/CYP19A1
GO:0071229	cellular response to acid chemical	8/96	1.45814e-05	0.000291904	CDK4/E2F1/ZEB1/COL1A2/CPEB3/PPARGC1A/PTGER4/CPEB1
GO:0043281	regulation of cysteine-type endopeptidase activity involved in apoptotic process	8/96	1.5132e-05	0.000300422	MYC/VEGFA/BCL2L11/HSPD1/BIRC5/FAS/CASP7/TNFRSF10B
GO:0002053	positive regulation of mesenchymal cell proliferation	4/96	1.51968e-05	0.000300422	MYC/VEGFA/FGFR1/FGF9
GO:0060541	respiratory system development	8/96	1.57e-05	0.000307718	VEGFA/FGFR1/FGF7/PROX1/THRB/FGF9/EPAS1/MYOCD
GO:0014910	regulation of smooth muscle cell migration	5/96	1.57605e-05	0.000307718	BCL2/PPARGC1A/IGF1/LPAR1/MYOCD
GO:2000134	negative regulation of G1/S transition of mitotic cell cycle	6/96	1.61007e-05	0.000312433	BCL2/EZH2/CCND1/E2F1/CDKN1A/CDC25C
GO:0048844	artery morphogenesis	5/96	1.71991e-05	0.000331712	NOTCH3/VEGFA/HAND2/PROX1/MYOCD
GO:0055074	calcium ion homeostasis	11/96	1.76519e-05	0.000338382	BCL2/ESR1/VDR/CXCL12/CAV1/PDGFRA/CCR7/PIK3CG/SLC8A1/LPAR1/JPH2
GO:0051384	response to glucocorticoid	7/96	1.80231e-05	0.000343415	BCL2/CCND1/CDKN1A/DNMT3B/HSPD1/IL10/FAS
GO:0046545	development of primary female sexual characteristics	6/96	1.81413e-05	0.000343598	BCL2/ESR1/VEGFA/KIT/PDGFRA/CYP19A1
GO:0007204	positive regulation of cytosolic calcium ion concentration	9/96	1.83698e-05	0.000345855	BCL2/ESR1/CAV1/PDGFRA/CCR7/PIK3CG/SLC8A1/LPAR1/JPH2
GO:0042493	response to drug	11/96	1.88999e-05	0.000353729	BCL2/CDK4/MYC/CCND1/CDKN1A/DNMT3B/HSPD1/IL10/PPARGC1A/SLC8A1/MT2A
GO:1902807	negative regulation of cell cycle G1/S phase transition	6/96	1.9237e-05	0.000357922	BCL2/EZH2/CCND1/E2F1/CDKN1A/CDC25C
GO:0007548	sex differentiation	9/96	1.95004e-05	0.0003607	BCL2/CCND1/ESR1/VEGFA/BCL2L11/KIT/PDGFRA/CYP19A1/FGF9
GO:0055013	cardiac muscle cell development	5/96	2.0382e-05	0.000369845	VEGFA/PROX1/PDGFRA/IGF1/SLC8A1
GO:0046854	phosphatidylinositol phosphorylation	6/96	2.03855e-05	0.000369845	KIT/FGFR1/FGF7/PDGFRA/PIK3CG/FGF9
GO:0071887	leukocyte apoptotic process	6/96	2.03855e-05	0.000369845	AURKB/BCL2L11/CXCL12/IL10/FAS/CCR7
GO:1901987	regulation of cell cycle phase transition	10/96	2.05205e-05	0.000369845	BCL2/CDK4/CCNA2/EZH2/CCND1/E2F1/CDKN1A/CDC6/UBE2C/CDC25C
GO:0048754	branching morphogenesis of an epithelial tube	7/96	2.05794e-05	0.000369845	BCL2/MYC/ESR1/VEGFA/VDR/CSF1/BMP2
GO:0043583	ear development	8/96	2.09249e-05	0.000371829	BCL2/CCNA2/ZEB1/BCL2L11/FGFR1/PROX1/FGF9/BMP2
GO:0090257	regulation of muscle system process	8/96	2.09249e-05	0.000371829	HAND2/CAV1/PPARGC1A/IGF1/PIK3CG/SLC8A1/MYOCD/PRKG1
GO:0010517	regulation of phospholipase activity	5/96	2.21361e-05	0.000391153	ESR1/KIT/FGFR1/PDGFRA/LPAR1
GO:0072503	cellular divalent inorganic cation homeostasis	11/96	2.26091e-05	0.000397292	BCL2/ESR1/VDR/CXCL12/CAV1/PDGFRA/CCR7/PIK3CG/SLC8A1/LPAR1/JPH2
GO:2001237	negative regulation of extrinsic apoptotic signaling pathway	6/96	2.28484e-05	0.000399279	BCL2/BRCA1/HMOX1/FAS/IGF1/TNFRSF10B
GO:0010656	negative regulation of muscle cell apoptotic process	4/96	2.34243e-05	0.000404934	HAND2/HMOX1/IGF1/MYOCD
GO:1902806	regulation of cell cycle G1/S phase transition	7/96	2.3428e-05	0.000404934	BCL2/EZH2/CCND1/E2F1/CDKN1A/CDC6/CDC25C
GO:0071496	cellular response to external stimulus	9/96	2.46352e-05	0.000423485	BCL2/CDKN1A/CHEK1/VDR/HMOX1/FAS/MYOCD/PTGER4/TNFRSF10B
GO:2000116	regulation of cysteine-type endopeptidase activity	8/96	2.48789e-05	0.000425363	MYC/VEGFA/BCL2L11/HSPD1/BIRC5/FAS/CASP7/TNFRSF10B
GO:0002688	regulation of leukocyte chemotaxis	6/96	2.55455e-05	0.000434412	VEGFA/CXCL12/CSF1/IL6R/CYP19A1/CCR7
GO:0045844	positive regulation of striated muscle tissue development	5/96	2.81105e-05	0.000470442	BCL2/FGFR1/IGF1/FGF9/MYOCD
GO:0048636	positive regulation of muscle organ development	5/96	2.81105e-05	0.000470442	BCL2/FGFR1/IGF1/FGF9/MYOCD
GO:0060193	positive regulation of lipase activity	5/96	2.81105e-05	0.000470442	ESR1/KIT/FGFR1/PDGFRA/LPAR1
GO:0043542	endothelial cell migration	7/96	2.88949e-05	0.000478505	ITGB3/VEGFA/FGFR1/MEOX2/PROX1/TNFSF12/NRP2
GO:1902275	regulation of chromatin organization	7/96	2.88949e-05	0.000478505	HMGA1/CHEK1/VEGFA/DNMT3B/BRCA1/PPARGC1A/MYOCD
GO:0055006	cardiac cell development	5/96	3.03573e-05	0.000497099	VEGFA/PROX1/PDGFRA/IGF1/SLC8A1
GO:0097421	liver regeneration	4/96	3.04718e-05	0.000497099	EZH2/CCND1/HMOX1/IL10
GO:0007517	muscle organ development	10/96	3.04892e-05	0.000497099	BCL2/CAV1/FGFR1/MEOX2/PROX1/IGF1/FGF9/MYOCD/BMP2/JPH2
GO:0010952	positive regulation of peptidase activity	7/96	3.1357e-05	0.000508626	MYC/BCL2L11/CAV1/HSPD1/FAS/CASP7/TNFRSF10B
GO:0002686	negative regulation of leukocyte migration	4/96	3.45252e-05	0.000543113	CXCL12/HMOX1/CYP19A1/PTGER4
GO:0002931	response to ischemia	4/96	3.45252e-05	0.000543113	BCL2/CAV1/HSPD1/PPARGC1A
GO:0010907	positive regulation of glucose metabolic process	4/96	3.45252e-05	0.000543113	KAT2B/PPARGC1A/IGF1/DYRK2
GO:0045737	positive regulation of cyclin-dependent protein serine/threonine kinase activity	4/96	3.45252e-05	0.000543113	CCND1/CDC6/PROX1/CKS2
GO:0060421	positive regulation of heart growth	4/96	3.45252e-05	0.000543113	FGFR1/PROX1/IGF1/FGF9
GO:0072507	divalent inorganic cation homeostasis	11/96	3.47589e-05	0.000543113	BCL2/ESR1/VDR/CXCL12/CAV1/PDGFRA/CCR7/PIK3CG/SLC8A1/LPAR1/JPH2
GO:0071156	regulation of cell cycle arrest	6/96	3.5209e-05	0.000543113	CDK4/CCND1/E2F1/CDKN1A/BRCA1/CDC25C
GO:0071482	cellular response to light stimulus	6/96	3.5209e-05	0.000543113	TP53INP1/AURKB/MYC/CDC25A/CDKN1A/CHEK1
GO:0009408	response to heat	7/96	3.53719e-05	0.000543113	TP53INP1/CDKN1A/CXCL12/HSPD1/HMOX1/IGF1/HSPB2
GO:0031570	DNA integrity checkpoint	7/96	3.53719e-05	0.000543113	CCND1/E2F1/CDKN1A/CHEK1/CDC6/BRCA1/CDC25C
GO:0031960	response to corticosteroid	7/96	3.53719e-05	0.000543113	BCL2/CCND1/CDKN1A/DNMT3B/HSPD1/IL10/FAS
GO:0009266	response to temperature stimulus	8/96	3.58231e-05	0.000547384	TP53INP1/CDKN1A/CXCL12/HSPD1/HMOX1/PPARGC1A/IGF1/HSPB2
GO:0043970	histone H3-K9 acetylation	3/96	3.7053e-05	0.000563454	CHEK1/BRCA1/KAT2B
GO:0014065	phosphatidylinositol 3-kinase signaling	7/96	3.82762e-05	0.000576513	KIT/FGFR1/FGF7/PDGFRA/IGF1/PIK3CG/FGF9
GO:0048863	stem cell differentiation	7/96	3.82762e-05	0.000576513	ZEB2/ESR1/SOX5/KIT/HAND2/PDGFRA/MYOCD
GO:0050931	pigment cell differentiation	4/96	3.89596e-05	0.000576632	ZEB2/BCL2/KIT/MITF
GO:0010634	positive regulation of epithelial cell migration	6/96	3.90134e-05	0.000576632	ITGB3/VEGFA/FGFR1/FGF7/PROX1/NRP2
GO:0046660	female sex differentiation	6/96	3.90134e-05	0.000576632	BCL2/ESR1/VEGFA/KIT/PDGFRA/CYP19A1
GO:0046834	lipid phosphorylation	6/96	3.90134e-05	0.000576632	KIT/FGFR1/FGF7/PDGFRA/PIK3CG/FGF9
GO:0009991	response to extracellular stimulus	11/96	3.93593e-05	0.00057904	BCL2/CCND1/CDKN1A/DNMT3B/VDR/PROX1/HMOX1/FAS/PPARGC1A/SLC8A1/MYOCD
GO:0018205	peptidyl-lysine modification	10/96	4.1407e-05	0.000606344	AURKB/EZH2/CHEK1/DNMT3B/BRCA1/MITF/KAT2B/BIRC5/PPARGC1A/MYOCD
GO:0071214	cellular response to abiotic stimulus	9/96	4.16148e-05	0.000606579	TP53INP1/AURKB/MYC/CDC25A/CDKN1A/CHEK1/FAS/PTGER4/TNFRSF10B
GO:0009416	response to light stimulus	9/96	4.50396e-05	0.000653488	TP53INP1/BCL2/AURKB/MYC/CDC25A/CCND1/CDKN1A/CHEK1/KIT
GO:0051090	regulation of sequence-specific DNA binding transcription factor activity	10/96	4.64174e-05	0.000670403	EZH2/ESR1/VEGFA/KIT/HAND2/PROX1/HMOX1/IL10/PPARGC1A/MYOCD
GO:0051480	regulation of cytosolic calcium ion concentration	9/96	4.74529e-05	0.000682243	BCL2/ESR1/CAV1/PDGFRA/CCR7/PIK3CG/SLC8A1/LPAR1/JPH2
GO:0048736	appendage development	7/96	4.81881e-05	0.000686571	RECK/BCL2L11/HAND2/FGFR1/MEOX2/FGF9/SALL4
GO:0060173	limb development	7/96	4.81881e-05	0.000686571	RECK/BCL2L11/HAND2/FGFR1/MEOX2/FGF9/SALL4
GO:0071392	cellular response to estradiol stimulus	4/96	4.90589e-05	0.000691206	CCNA2/ESR1/IL10/PPARGC1A
GO:1902042	negative regulation of extrinsic apoptotic signaling pathway via death domain receptors	4/96	4.90589e-05	0.000691206	BRCA1/HMOX1/FAS/TNFRSF10B
GO:0042110	T cell activation	11/96	4.9169e-05	0.000691206	BCL2/ZEB1/KIT/CAV1/HSPD1/IL10/FAS/IGF1/CCR7/PIK3CG/PTGER4
GO:0042476	odontogenesis	6/96	4.99811e-05	0.000699514	COL1A2/BCL2L11/AXIN2/HAND2/CSF1/BMP2
GO:0010595	positive regulation of endothelial cell migration	5/96	5.02489e-05	0.000700164	ITGB3/VEGFA/FGFR1/PROX1/NRP2
GO:0043280	positive regulation of cysteine-type endopeptidase activity involved in apoptotic process	6/96	5.24448e-05	0.000727557	MYC/BCL2L11/HSPD1/FAS/CASP7/TNFRSF10B
GO:0030857	negative regulation of epithelial cell differentiation	4/96	5.47682e-05	0.000753161	EZH2/CCND1/ZEB1/CAV1
GO:0048662	negative regulation of smooth muscle cell proliferation	4/96	5.47682e-05	0.000753161	HMOX1/IL10/PPARGC1A/MYOCD
GO:0010594	regulation of endothelial cell migration	6/96	5.50048e-05	0.000753161	ITGB3/VEGFA/FGFR1/MEOX2/PROX1/NRP2
GO:0032496	response to lipopolysaccharide	9/96	5.53595e-05	0.00075475	CDK4/HSPD1/IL10/FAS/PPARGC1A/CCR7/PTGER4/CPEB1/TNFRSF10B
GO:0021537	telencephalon development	8/96	5.70032e-05	0.000773824	ZEB2/EZH2/CXCL12/PROX1/SLC8A1/LPAR1/PHLPP2/BMP2
GO:0097531	mast cell migration	3/96	6.08045e-05	0.000821262	VEGFA/KIT/MITF
GO:0002521	leukocyte differentiation	11/96	6.1017e-05	0.000821262	BCL2/MYC/ZEB1/VEGFA/KIT/MITF/CSF1/IL10/FAS/CCR7/PTGER4
GO:0010632	regulation of epithelial cell migration	7/96	6.23183e-05	0.000835223	ITGB3/VEGFA/FGFR1/FGF7/MEOX2/PROX1/NRP2
GO:0044089	positive regulation of cellular component biogenesis	11/96	6.3416e-05	0.000846349	ESR1/VEGFA/BCL2L11/KIT/MITF/CAV1/PROX1/FAS/CCR7/LPAR1/LIMK1
GO:0001701	in utero embryonic development	9/96	6.59635e-05	0.00087665	VEGFA/BCL2L11/HAND2/FGFR1/IL10/IGF1/EPAS1/BMP2/SALL4
GO:0010559	regulation of glycoprotein biosynthetic process	4/96	6.76201e-05	0.000891176	BCL2/KAT2B/IGF1/CCR7
GO:0071312	cellular response to alkaloid	4/96	6.76201e-05	0.000891176	CCNA2/PPARGC1A/SLC8A1/CASP7
GO:0030856	regulation of epithelial cell differentiation	6/96	6.93467e-05	0.000910139	ZEB2/EZH2/CCND1/ZEB1/VDR/CAV1
GO:0045833	negative regulation of lipid metabolic process	5/96	7.42446e-05	0.000967843	BRCA1/TRIB3/PROX1/PIK3CG/BMP2
GO:1901654	response to ketone	7/96	7.43553e-05	0.000967843	CDK4/CCND1/CDKN1A/DNMT3B/CAV1/CCR7/PTGER4
GO:0055025	positive regulation of cardiac muscle tissue development	4/96	7.48094e-05	0.000969763	FGFR1/IGF1/FGF9/MYOCD
GO:0030949	positive regulation of vascular endothelial growth factor receptor signaling pathway	3/96	7.56944e-05	0.000971404	ITGB3/VEGFA/FGF9
GO:0030326	embryonic limb morphogenesis	6/96	7.58574e-05	0.000971404	RECK/BCL2L11/HAND2/FGFR1/FGF9/SALL4
GO:0035113	embryonic appendage morphogenesis	6/96	7.58574e-05	0.000971404	RECK/BCL2L11/HAND2/FGFR1/FGF9/SALL4
GO:0048762	mesenchymal cell differentiation	7/96	7.69766e-05	0.00097782	ZEB2/BCL2/EZH2/AXIN2/HAND2/FGFR1/BMP2
GO:0051216	cartilage development	7/96	7.69766e-05	0.00097782	ZEB1/SOX5/AXIN2/HAND2/FGFR1/FGF9/BMP2
GO:0021700	developmental maturation	8/96	7.84385e-05	0.000987379	BCL2/CDKN1A/RECK/VEGFA/FGFR1/IGF1/EPAS1/BMP2
GO:0034599	cellular response to oxidative stress	8/96	7.84385e-05	0.000987379	TP53INP1/BCL2/CCNA2/EZH2/HMOX1/PDGFRA/PPARGC1A/EPAS1
GO:0060840	artery development	5/96	7.89778e-05	0.000987379	NOTCH3/VEGFA/HAND2/PROX1/MYOCD
GO:0070542	response to fatty acid	5/96	7.89778e-05	0.000987379	CDK4/E2F1/PPARGC1A/CCR7/PTGER4
GO:2001056	positive regulation of cysteine-type endopeptidase activity	6/96	7.92907e-05	0.000987387	MYC/BCL2L11/HSPD1/FAS/CASP7/TNFRSF10B
GO:0001101	response to acid chemical	9/96	8.01319e-05	0.000990067	CDK4/E2F1/ZEB1/COL1A2/CPEB3/PPARGC1A/CCR7/PTGER4/CPEB1
GO:0002237	response to molecule of bacterial origin	9/96	8.01319e-05	0.000990067	CDK4/HSPD1/IL10/FAS/PPARGC1A/CCR7/PTGER4/CPEB1/TNFRSF10B
GO:0052547	regulation of peptidase activity	10/96	8.16728e-05	0.00100518	MYC/RECK/VEGFA/BCL2L11/CAV1/HSPD1/BIRC5/FAS/CASP7/TNFRSF10B
GO:0048565	digestive tract development	6/96	8.28467e-05	0.00101568	BCL2/CDKN1A/KIT/PDGFRA/FGF9/MYOCD
GO:0060191	regulation of lipase activity	5/96	8.394e-05	0.00102511	ESR1/KIT/FGFR1/PDGFRA/LPAR1
GO:0051403	stress-activated MAPK cascade	8/96	8.77299e-05	0.00106727	ZEB2/MYC/VEGFA/HAND2/FAS/CCR7/BMP2/PTGER4
GO:2000106	regulation of leukocyte apoptotic process	5/96	8.91388e-05	0.00108025	AURKB/CXCL12/IL10/FAS/CCR7
GO:0003012	muscle system process	10/96	9.05736e-05	0.00108419	EZH2/HAND2/CAV1/HMOX1/PPARGC1A/IGF1/PIK3CG/SLC8A1/MYOCD/PRKG1
GO:0010975	regulation of neuron projection development	10/96	9.05736e-05	0.00108419	ZEB2/EZH2/VEGFA/PTPRO/CXCL12/FGFR1/CPEB3/LPAR1/LIMK1/CPEB1
GO:0007595	lactation	4/96	9.08347e-05	0.00108419	CCND1/VEGFA/VDR/CAV1
GO:0061647	histone H3-K9 modification	4/96	9.08347e-05	0.00108419	CHEK1/DNMT3B/BRCA1/KAT2B
GO:0031000	response to caffeine	3/96	9.27809e-05	0.00110326	DNMT3B/PPARGC1A/SLC8A1
GO:0031056	regulation of histone modification	6/96	9.42839e-05	0.00111628	CHEK1/VEGFA/DNMT3B/BRCA1/PPARGC1A/MYOCD
GO:0008625	extrinsic apoptotic signaling pathway via death domain receptors	5/96	9.45817e-05	0.00111628	BCL2/BRCA1/HMOX1/FAS/TNFRSF10B
GO:0022602	ovulation cycle process	5/96	0.000100277	0.00117039	BCL2/ESR1/VEGFA/KIT/PDGFRA
GO:0043500	muscle adaptation	5/96	0.000100277	0.00117039	EZH2/HAND2/HMOX1/PPARGC1A/IGF1
GO:0046620	regulation of organ growth	5/96	0.000100277	0.00117039	BCL2L11/FGFR1/PROX1/IGF1/FGF9
GO:0031098	stress-activated protein kinase signaling cascade	8/96	0.000103367	0.00120203	ZEB2/MYC/VEGFA/HAND2/FAS/CCR7/BMP2/PTGER4
GO:0031667	response to nutrient levels	10/96	0.000108679	0.00125916	BCL2/CCND1/CDKN1A/DNMT3B/VDR/PROX1/HMOX1/FAS/PPARGC1A/SLC8A1
GO:1903018	regulation of glycoprotein metabolic process	4/96	0.000109219	0.0012608	BCL2/KAT2B/IGF1/CCR7
GO:0008015	blood circulation	11/96	0.000110418	0.00127001	COL1A2/PTPRO/CXCL12/CAV1/MEOX2/HMOX1/THRB/PIK3CG/SLC8A1/EPAS1/PRKG1
GO:0030099	myeloid cell differentiation	9/96	0.000111094	0.00127202	MYC/MEIS1/VEGFA/KIT/MITF/CSF1/FAS/CCR7/EPAS1
GO:0072331	signal transduction by p53 class mediator	8/96	0.000112012	0.00127202	TP53INP1/AURKB/E2F1/CDKN1A/CHEK1/BRCA1/CDC25C/DYRK2
GO:0060749	mammary gland alveolus development	3/96	0.000112201	0.00127202	CCND1/ESR1/VEGFA
GO:0061377	mammary gland lobule development	3/96	0.000112201	0.00127202	CCND1/ESR1/VEGFA
GO:0003013	circulatory system process	11/96	0.00011851	0.00133873	COL1A2/PTPRO/CXCL12/CAV1/MEOX2/HMOX1/THRB/PIK3CG/SLC8A1/EPAS1/PRKG1
GO:0046622	positive regulation of organ growth	4/96	0.000119358	0.00133875	FGFR1/PROX1/IGF1/FGF9
GO:0060443	mammary gland morphogenesis	4/96	0.000119358	0.00133875	ESR1/VDR/CAV1/CSF1
GO:0055002	striated muscle cell development	6/96	0.00012092	0.00135149	BCL2/VEGFA/PROX1/PDGFRA/IGF1/SLC8A1
GO:0001654	eye development	9/96	0.000121592	0.0013542	ZEB2/BCL2/CDK4/MEIS1/ZEB1/VEGFA/PROX1/PDGFRA/FGF9
GO:0002690	positive regulation of leukocyte chemotaxis	5/96	0.000125735	0.0013874	VEGFA/CXCL12/CSF1/IL6R/CCR7
GO:0008584	male gonad development	6/96	0.000125888	0.0013874	BCL2/CCND1/ESR1/BCL2L11/KIT/FGF9
GO:0046546	development of primary male sexual characteristics	6/96	0.000125888	0.0013874	BCL2/CCND1/ESR1/BCL2L11/KIT/FGF9
GO:0048568	embryonic organ development	10/96	0.000129765	0.00142457	ZEB1/VEGFA/KIT/HAND2/FGFR1/PROX1/PDGFRA/IL10/FGF9/EPAS1
GO:0051055	negative regulation of lipid biosynthetic process	4/96	0.000130162	0.00142457	BRCA1/TRIB3/PROX1/BMP2
GO:0055123	digestive system development	6/96	0.000131016	0.00142898	BCL2/CDKN1A/KIT/PDGFRA/FGF9/MYOCD
GO:0044346	fibroblast apoptotic process	3/96	0.000134091	0.0014525	MYC/BCL2L11/PIK3CG
GO:1900745	positive regulation of p38MAPK cascade	3/96	0.000134091	0.0014525	VEGFA/HAND2/BMP2
GO:0051100	negative regulation of binding	6/96	0.000136309	0.00146648	AURKB/E2F1/HAND2/CAV1/HMOX1/IL10
GO:1904018	positive regulation of vasculature development	6/96	0.000136309	0.00146648	VEGFA/KIT/BRCA1/TNFSF12/HMOX1/MYOCD
GO:0030258	lipid modification	8/96	0.000141614	0.00150983	KIT/FGFR1/FGF7/PDGFRA/PPARGC1A/PIK3CG/FGF9/CROT
GO:0010950	positive regulation of endopeptidase activity	6/96	0.00014177	0.00150983	MYC/BCL2L11/HSPD1/FAS/CASP7/TNFRSF10B
GO:0072073	kidney epithelium development	6/96	0.00014177	0.00150983	BCL2/MYC/VEGFA/PTPRO/FGFR1/BMP2
GO:0070661	leukocyte proliferation	8/96	0.000145268	0.00154189	BCL2/CDKN1A/KIT/HSPD1/CSF1/IL10/IGF1/PIK3CG
GO:0032872	regulation of stress-activated MAPK cascade	7/96	0.000147464	0.00155996	ZEB2/MYC/VEGFA/HAND2/FAS/CCR7/BMP2
GO:0070302	regulation of stress-activated protein kinase signaling cascade	7/96	0.000152034	0.00159762	ZEB2/MYC/VEGFA/HAND2/FAS/CCR7/BMP2
GO:2001234	negative regulation of apoptotic signaling pathway	7/96	0.000152034	0.00159762	BCL2/CXCL12/BRCA1/HMOX1/FAS/IGF1/TNFRSF10B
GO:0035148	tube formation	6/96	0.000153212	0.00160467	ZEB2/VEGFA/BCL2L11/PROX1/KIF20B/SALL4
GO:0010660	regulation of muscle cell apoptotic process	4/96	0.000153869	0.00160623	HAND2/HMOX1/IGF1/MYOCD
GO:0051149	positive regulation of muscle cell differentiation	5/96	0.000155877	0.00162184	BCL2/KIT/PROX1/IGF1/MYOCD
GO:0001649	osteoblast differentiation	7/96	0.000156719	0.00162525	AXIN2/HAND2/IL6R/IGF1/FGF9/BMP2/IARS
GO:0035886	vascular smooth muscle cell differentiation	3/96	0.000158581	0.00162855	VEGFA/KIT/MYOCD
GO:0042522	regulation of tyrosine phosphorylation of Stat5 protein	3/96	0.000158581	0.00162855	KIT/CAV1/IGF1
GO:1903427	negative regulation of reactive oxygen species biosynthetic process	3/96	0.000158581	0.00162855	CAV1/HSPD1/IL10
GO:0045930	negative regulation of mitotic cell cycle	8/96	0.000160673	0.00164272	BCL2/EZH2/CCND1/E2F1/CDKN1A/CHEK1/IL10/CDC25C
GO:0009612	response to mechanical stimulus	7/96	0.000161519	0.00164272	CHEK1/CXCL12/KIT/FAS/SLC8A1/PTGER4/TNFRSF10B
GO:0060560	developmental growth involved in morphogenesis	7/96	0.000161519	0.00164272	ZEB2/ESR1/VEGFA/CXCL12/CSF1/NRP2/LIMK1
GO:0016570	histone modification	10/96	0.000163187	0.00165436	CCNA2/AURKB/EZH2/CHEK1/VEGFA/DNMT3B/BRCA1/KAT2B/PPARGC1A/MYOCD
GO:0048015	phosphatidylinositol-mediated signaling	7/96	0.000166439	0.00168194	KIT/FGFR1/FGF7/PDGFRA/IGF1/PIK3CG/FGF9
GO:0014066	regulation of phosphatidylinositol 3-kinase signaling	6/96	0.000171734	0.00171897	KIT/FGFR1/FGF7/PDGFRA/IGF1/FGF9
GO:0035107	appendage morphogenesis	6/96	0.000171734	0.00171897	RECK/BCL2L11/HAND2/FGFR1/FGF9/SALL4
GO:0035108	limb morphogenesis	6/96	0.000171734	0.00171897	RECK/BCL2L11/HAND2/FGFR1/FGF9/SALL4
GO:0036092	phosphatidylinositol-3-phosphate biosynthetic process	4/96	0.000180551	0.00179586	FGFR1/FGF7/PIK3CG/FGF9
GO:0043550	regulation of lipid kinase activity	4/96	0.000180551	0.00179586	KIT/PDGFRA/RBL1/CCR7
GO:0048017	inositol lipid-mediated signaling	7/96	0.00018193	0.0018039	KIT/FGFR1/FGF7/PDGFRA/IGF1/PIK3CG/FGF9
GO:0010212	response to ionizing radiation	6/96	0.000185035	0.00182895	BCL2/MYC/CCND1/CDKN1A/DNMT3B/BRCA1
GO:0060065	uterus development	3/96	0.000185803	0.00183082	ESR1/CYP19A1/MYOCD
GO:0051054	positive regulation of DNA metabolic process	7/96	0.000187345	0.00184029	AURKB/MYC/BRCA1/FGFR1/PDGFRA/PPARGC1A/IGF1
GO:0010676	positive regulation of cellular carbohydrate metabolic process	4/96	0.000195073	0.00189269	KAT2B/PPARGC1A/IGF1/DYRK2
GO:0035065	regulation of histone acetylation	4/96	0.000195073	0.00189269	CHEK1/BRCA1/PPARGC1A/MYOCD
GO:0051145	smooth muscle cell differentiation	4/96	0.000195073	0.00189269	ZEB1/VEGFA/KIT/MYOCD
GO:0060420	regulation of heart growth	4/96	0.000195073	0.00189269	FGFR1/PROX1/IGF1/FGF9
GO:0010657	muscle cell apoptotic process	4/96	0.00021042	0.00202297	HAND2/HMOX1/IGF1/MYOCD
GO:0050810	regulation of steroid biosynthetic process	4/96	0.00021042	0.00202297	VDR/PROX1/PPARGC1A/BMP2
GO:0071398	cellular response to fatty acid	4/96	0.00021042	0.00202297	CDK4/E2F1/PPARGC1A/PTGER4
GO:0002062	chondrocyte differentiation	5/96	0.000211091	0.00202327	SOX5/AXIN2/FGFR1/FGF9/BMP2
GO:0000077	DNA damage checkpoint	6/96	0.000214074	0.00202623	CCND1/E2F1/CDKN1A/CHEK1/BRCA1/CDC25C
GO:0007088	regulation of mitotic nuclear division	6/96	0.000214074	0.00202623	CHEK1/CDC6/KIF20B/IGF1/UBE2C/CDC25C
GO:0055001	muscle cell development	6/96	0.000214074	0.00202623	BCL2/VEGFA/PROX1/PDGFRA/IGF1/SLC8A1
GO:0098727	maintenance of cell number	6/96	0.000214074	0.00202623	EZH2/KIT/PROX1/IGF1/EPAS1/SALL4
GO:0048846	axon extension involved in axon guidance	3/96	0.000215884	0.00202623	VEGFA/CXCL12/NRP2
GO:1902284	neuron projection extension involved in neuron projection guidance	3/96	0.000215884	0.00202623	VEGFA/CXCL12/NRP2
GO:1902667	regulation of axon guidance	3/96	0.000215884	0.00202623	VEGFA/PTPRO/CXCL12
GO:0001657	ureteric bud development	5/96	0.000221577	0.0020674	BCL2/MYC/VEGFA/FGFR1/BMP2
GO:0043473	pigmentation	5/96	0.000221577	0.0020674	ZEB2/BCL2/BCL2L11/KIT/MITF
GO:0032844	regulation of homeostatic process	10/96	0.000222776	0.00207247	BCL2/AURKB/MYC/ITGB3/CAV1/PPARGC1A/CCR7/SLC8A1/UBE2C/JPH2
GO:0045862	positive regulation of proteolysis	9/96	0.00023009	0.00213424	MYC/BCL2L11/CAV1/TRIB3/HSPD1/FAS/CASP7/UBE2C/TNFRSF10B
GO:0090066	regulation of anatomical structure size	10/96	0.000230858	0.0021351	CDK4/VEGFA/CXCL12/CAV1/AKT3/HMOX1/CCR7/SLC8A1/LIMK1/PRKG1
GO:0072163	mesonephric epithelium development	5/96	0.000232456	0.00213738	BCL2/MYC/VEGFA/FGFR1/BMP2
GO:0072164	mesonephric tubule development	5/96	0.000232456	0.00213738	BCL2/MYC/VEGFA/FGFR1/BMP2
GO:0007067	mitotic nuclear division	10/96	0.000239185	0.00219288	CCNA2/AURKB/CDC25A/CHEK1/CDC6/KIF20B/BIRC5/IGF1/UBE2C/CDC25C
GO:0060688	regulation of morphogenesis of a branching structure	4/96	0.000243694	0.00221476	ESR1/VEGFA/FGFR1/FGF7
GO:0070527	platelet aggregation	4/96	0.000243694	0.00221476	ITGB3/PDGFRA/PIK3CG/PRKG1
GO:0022037	metencephalon development	5/96	0.000243736	0.00221476	BCL2/EZH2/PROX1/PPARGC1A/LPAR1
GO:0052548	regulation of endopeptidase activity	9/96	0.000244373	0.00221476	MYC/RECK/VEGFA/BCL2L11/HSPD1/BIRC5/FAS/CASP7/TNFRSF10B
GO:0051099	positive regulation of binding	6/96	0.000246596	0.00222217	HAND2/CAV1/TRIB3/IGF1/MYOCD/BMP2
GO:2000377	regulation of reactive oxygen species metabolic process	6/96	0.000246596	0.00222217	BCL2/CDKN1A/BRCA1/CAV1/HSPD1/IL10
GO:0042506	tyrosine phosphorylation of Stat5 protein	3/96	0.000248948	0.00222505	KIT/CAV1/IGF1
GO:0048103	somatic stem cell division	3/96	0.000248948	0.00222505	SOX5/KIT/FGFR1
GO:0009636	response to toxic substance	7/96	0.000249026	0.00222505	TP53INP1/BCL2/CDK4/CDKN1A/DNMT3B/FAS/GPX2
GO:0060249	anatomical structure homeostasis	9/96	0.000254298	0.00226576	BCL2/AURKB/MYC/CCNE1/ITGB3/VEGFA/AKT3/CSF1/EPAS1
GO:0051155	positive regulation of striated muscle cell differentiation	4/96	0.000261676	0.00231844	BCL2/PROX1/IGF1/MYOCD
GO:2000756	regulation of peptidyl-lysine acetylation	4/96	0.000261676	0.00231844	CHEK1/BRCA1/PPARGC1A/MYOCD
GO:0050730	regulation of peptidyl-tyrosine phosphorylation	7/96	0.00026313	0.00232481	ITGB3/VEGFA/KIT/CAV1/FGF7/IL6R/IGF1
GO:0001823	mesonephros development	5/96	0.000280087	0.00245849	BCL2/MYC/VEGFA/FGFR1/BMP2
GO:0021761	limbic system development	5/96	0.000280087	0.00245849	ZEB2/EZH2/FGFR1/PROX1/PHLPP2
GO:0001541	ovarian follicle development	4/96	0.000280593	0.00245849	BCL2/ESR1/VEGFA/KIT
GO:0046661	male sex differentiation	6/96	0.000282888	0.00247176	BCL2/CCND1/ESR1/BCL2L11/KIT/FGF9
GO:0001783	B cell apoptotic process	3/96	0.00028512	0.00247396	AURKB/BCL2L11/IL10
GO:0060444	branching involved in mammary gland duct morphogenesis	3/96	0.00028512	0.00247396	ESR1/VDR/CSF1
GO:0042180	cellular ketone metabolic process	7/96	0.000285487	0.00247396	BRCA1/CAV1/TRIB3/PROX1/PPARGC1A/CYP19A1/BMP2
GO:0010565	regulation of cellular ketone metabolic process	6/96	0.000292586	0.00252855	BRCA1/CAV1/TRIB3/PROX1/PPARGC1A/BMP2
GO:1902041	regulation of extrinsic apoptotic signaling pathway via death domain receptors	4/96	0.000300471	0.00258962	BRCA1/HMOX1/FAS/TNFRSF10B
GO:1901615	organic hydroxy compound metabolic process	10/96	0.000304848	0.0026202	ZEB2/BCL2/VDR/HAND2/FGFR1/PROX1/IGF1/CYP19A1/EPAS1/BMP2
GO:0042698	ovulation cycle	5/96	0.000306512	0.00262737	BCL2/ESR1/VEGFA/KIT/PDGFRA
GO:0038084	vascular endothelial growth factor signaling pathway	3/96	0.00032452	0.0027593	VEGFA/PDGFRA/NRP2
GO:0045736	negative regulation of cyclin-dependent protein serine/threonine kinase activity	3/96	0.00032452	0.0027593	CDKN1A/KAT2B/MYOCD
GO:0060561	apoptotic process involved in morphogenesis	3/96	0.00032452	0.0027593	VDR/BCL2L11/HAND2
GO:0001658	branching involved in ureteric bud morphogenesis	4/96	0.000343229	0.0028907	BCL2/MYC/VEGFA/BMP2
GO:0070059	intrinsic apoptotic signaling pathway in response to endoplasmic reticulum stress	4/96	0.000343229	0.0028907	BCL2/BCL2L11/TRIB3/TNFRSF10B
GO:1901992	positive regulation of mitotic cell cycle phase transition	4/96	0.000343229	0.0028907	CDK4/CCND1/CDC6/UBE2C
GO:0006352	DNA-templated transcription, initiation	7/96	0.000343631	0.0028907	NOTCH3/ESR1/VDR/MITF/KAT2B/THRB/PPARGC1A
GO:0043200	response to amino acid	5/96	0.000364994	0.00303916	ZEB1/COL1A2/CPEB3/PPARGC1A/CPEB1
GO:0014823	response to activity	4/96	0.000366164	0.00303916	DNMT3B/HSPD1/IL10/PPARGC1A
GO:1904030	negative regulation of cyclin-dependent protein kinase activity	3/96	0.000367266	0.00303916	CDKN1A/KAT2B/MYOCD
GO:1904705	regulation of vascular smooth muscle cell proliferation	3/96	0.000367266	0.00303916	HMOX1/IL10/MYOCD
GO:1990874	vascular smooth muscle cell proliferation	3/96	0.000367266	0.00303916	HMOX1/IL10/MYOCD
GO:0050731	positive regulation of peptidyl-tyrosine phosphorylation	6/96	0.000368005	0.00303916	ITGB3/VEGFA/KIT/FGF7/IL6R/IGF1
GO:0071478	cellular response to radiation	6/96	0.000368005	0.00303916	TP53INP1/AURKB/MYC/CDC25A/CDKN1A/CHEK1
GO:0042306	regulation of protein import into nucleus	6/96	0.000379916	0.0031212	CDKN1A/AXIN2/IL10/IGF1/MXI1/DYRK2
GO:0045667	regulation of osteoblast differentiation	5/96	0.000380849	0.0031212	AXIN2/HAND2/IL6R/IGF1/BMP2
GO:0090287	regulation of cellular response to growth factor stimulus	7/96	0.000380899	0.0031212	ZEB1/ITGB3/VEGFA/CAV1/FGFR1/FGF9/MYOCD
GO:0016049	cell growth	10/96	0.000391334	0.00319842	ZEB2/BCL2/CDKN1A/ITGB3/VEGFA/CXCL12/IGF1/NRP2/MYOCD/LIMK1
GO:0051101	regulation of DNA binding	5/96	0.00039722	0.00322983	E2F1/HAND2/HMOX1/IGF1/MYOCD
GO:0072009	nephron epithelium development	5/96	0.00039722	0.00322983	BCL2/MYC/VEGFA/PTPRO/BMP2
GO:1901342	regulation of vasculature development	7/96	0.000410922	0.00332779	VEGFA/KIT/BRCA1/MEOX2/TNFSF12/HMOX1/MYOCD
GO:0010038	response to metal ion	8/96	0.000411546	0.00332779	BCL2/CDK4/CCND1/CAV1/HMOX1/FAS/PPARGC1A/MT2A
GO:0030947	regulation of vascular endothelial growth factor receptor signaling pathway	3/96	0.000413475	0.00332779	ITGB3/VEGFA/FGF9
GO:0051150	regulation of smooth muscle cell differentiation	3/96	0.000413475	0.00332779	ZEB1/KIT/MYOCD
GO:1901983	regulation of protein acetylation	4/96	0.000415291	0.00333392	CHEK1/BRCA1/PPARGC1A/MYOCD
GO:1904589	regulation of protein import	6/96	0.000417468	0.00334292	CDKN1A/AXIN2/IL10/IGF1/MXI1/DYRK2
GO:0045165	cell fate commitment	7/96	0.000431969	0.00345029	BCL2/NOTCH3/SOX5/FGFR1/PROX1/EPAS1/BMP2
GO:0002694	regulation of leukocyte activation	10/96	0.000438208	0.00349132	BCL2/ZEB1/CDKN1A/CAV1/HSPD1/HMOX1/IL10/FAS/IGF1/CCR7
GO:0043434	response to peptide hormone	9/96	0.000440234	0.00349864	CDK4/CCNA2/CDC6/CXCL12/CAV1/TRIB3/KAT2B/IL10/CPEB1
GO:0032835	glomerulus development	4/96	0.00044154	0.00350023	BCL2/NOTCH3/PTPRO/PDGFRA
GO:0051783	regulation of nuclear division	6/96	0.000444073	0.00351151	CHEK1/CDC6/KIF20B/IGF1/UBE2C/CDC25C
GO:0006367	transcription initiation from RNA polymerase II promoter	6/96	0.000457862	0.00361152	NOTCH3/ESR1/VDR/KAT2B/THRB/PPARGC1A
GO:0000083	regulation of transcription involved in G1/S transition of mitotic cell cycle	3/96	0.00046326	0.00364446	E2F1/CCNE1/CDC6
GO:0017038	protein import	8/96	0.00046637	0.00364446	CDKN1A/AXIN2/HSPD1/IL10/IGF1/FGF9/MXI1/DYRK2
GO:0042308	negative regulation of protein import into nucleus	4/96	0.000468952	0.00364446	AXIN2/IL10/MXI1/DYRK2
GO:0060675	ureteric bud morphogenesis	4/96	0.000468952	0.00364446	BCL2/MYC/VEGFA/BMP2
GO:0071230	cellular response to amino acid stimulus	4/96	0.000468952	0.00364446	ZEB1/COL1A2/CPEB3/CPEB1
GO:1904590	negative regulation of protein import	4/96	0.000468952	0.00364446	AXIN2/IL10/MXI1/DYRK2
GO:0002687	positive regulation of leukocyte migration	5/96	0.000487185	0.00377685	VEGFA/CXCL12/CSF1/IL6R/CCR7
GO:0071383	cellular response to steroid hormone stimulus	7/96	0.000488376	0.00377685	CCNE1/ESR1/DNMT3B/VDR/BRCA1/THRB/PPARGC1A
GO:0014068	positive regulation of phosphatidylinositol 3-kinase signaling	4/96	0.000497556	0.00381983	KIT/FGFR1/PDGFRA/IGF1
GO:0045913	positive regulation of carbohydrate metabolic process	4/96	0.000497556	0.00381983	KAT2B/PPARGC1A/IGF1/DYRK2
GO:0072171	mesonephric tubule morphogenesis	4/96	0.000497556	0.00381983	BCL2/MYC/VEGFA/BMP2
GO:0008637	apoptotic mitochondrial changes	5/96	0.000506879	0.00388198	BCL2/E2F1/BCL2L11/HSPD1/IGF1
GO:0090596	sensory organ morphogenesis	7/96	0.000512521	0.00391571	BCL2/MEIS1/ZEB1/VEGFA/FGFR1/PROX1/FGF9
GO:0008209	androgen metabolic process	3/96	0.000516732	0.00392891	ESR1/PPARGC1A/CYP19A1
GO:1900744	regulation of p38MAPK cascade	3/96	0.000516732	0.00392891	VEGFA/HAND2/BMP2
GO:0002088	lens development in camera-type eye	4/96	0.000527381	0.00396225	ZEB2/CDK4/MEIS1/PROX1
GO:0040014	regulation of multicellular organism growth	4/96	0.000527381	0.00396225	BCL2/CDK4/CSF1/IGF1
GO:0042440	pigment metabolic process	4/96	0.000527381	0.00396225	ZEB2/BCL2/HMOX1/PPARGC1A
GO:0061180	mammary gland epithelium development	4/96	0.000527381	0.00396225	CCND1/ESR1/VDR/CSF1
GO:1901989	positive regulation of cell cycle phase transition	4/96	0.000527381	0.00396225	CDK4/CCND1/CDC6/UBE2C
GO:0048839	inner ear development	6/96	0.0005319	0.00398673	CCNA2/ZEB1/FGFR1/PROX1/FGF9/BMP2
GO:0032970	regulation of actin filament-based process	8/96	0.000548565	0.00410192	CXCL12/CAV1/PROX1/PDGFRA/CCR7/LPAR1/LIMK1/PTGER4
GO:0042509	regulation of tyrosine phosphorylation of STAT protein	4/96	0.000558457	0.00416604	KIT/CAV1/IL6R/IGF1
GO:0055023	positive regulation of cardiac muscle tissue growth	3/96	0.000574003	0.00424199	FGFR1/IGF1/FGF9
GO:1900739	regulation of protein insertion into mitochondrial membrane involved in apoptotic signaling pathway	3/96	0.000574003	0.00424199	BCL2/E2F1/BCL2L11
GO:1900740	positive regulation of protein insertion into mitochondrial membrane involved in apoptotic signaling pathway	3/96	0.000574003	0.00424199	BCL2/E2F1/BCL2L11
GO:2000725	regulation of cardiac muscle cell differentiation	3/96	0.000574003	0.00424199	IGF1/MYOCD/BMP2
GO:0043393	regulation of protein binding	6/96	0.000580599	0.00428073	BCL2/AURKB/CAV1/TRIB3/IL10/BMP2
GO:0033077	T cell differentiation in thymus	4/96	0.000590812	0.00434236	BCL2/ZEB1/FAS/CCR7
GO:0032387	negative regulation of intracellular transport	5/96	0.000591703	0.00434236	AXIN2/HMOX1/IL10/MXI1/DYRK2
GO:0043401	steroid hormone mediated signaling pathway	6/96	0.00059758	0.00436523	CCNE1/ESR1/VDR/BRCA1/THRB/PPARGC1A
GO:0060348	bone development	6/96	0.00059758	0.00436523	MEIS1/AXIN2/KIT/IGF1/BMP2/PTGER4
GO:0038034	signal transduction in absence of ligand	4/96	0.000624477	0.00453032	BCL2/BCL2L11/FGFR1/FAS
GO:0070227	lymphocyte apoptotic process	4/96	0.000624477	0.00453032	AURKB/BCL2L11/IL10/FAS
GO:0097192	extrinsic apoptotic signaling pathway in absence of ligand	4/96	0.000624477	0.00453032	BCL2/BCL2L11/FGFR1/FAS
GO:0002573	myeloid leukocyte differentiation	6/96	0.000632697	0.00455571	MYC/VEGFA/KIT/MITF/CSF1/CCR7
GO:0032943	mononuclear cell proliferation	7/96	0.000633235	0.00455571	BCL2/CDKN1A/HSPD1/CSF1/IL10/IGF1/PIK3CG
GO:0043552	positive regulation of phosphatidylinositol 3-kinase activity	3/96	0.000635178	0.00455571	KIT/PDGFRA/CCR7
GO:0051154	negative regulation of striated muscle cell differentiation	3/96	0.000635178	0.00455571	EZH2/MYOCD/BMP2
GO:1902742	apoptotic process involved in development	3/96	0.000635178	0.00455571	VDR/BCL2L11/HAND2
GO:0048588	developmental cell growth	6/96	0.000650846	0.00465753	ZEB2/VEGFA/CXCL12/IGF1/NRP2/LIMK1
GO:0031571	mitotic G1 DNA damage checkpoint	4/96	0.000659481	0.00469806	CCND1/E2F1/CDKN1A/CDC25C
GO:0044819	mitotic G1/S transition checkpoint	4/96	0.000659481	0.00469806	CCND1/E2F1/CDKN1A/CDC25C
GO:0051493	regulation of cytoskeleton organization	9/96	0.000679631	0.00483072	CHEK1/CXCL12/BRCA1/PROX1/PDGFRA/CCR7/LPAR1/LIMK1/PTGER4
GO:0007260	tyrosine phosphorylation of STAT protein	4/96	0.000695853	0.00492278	KIT/CAV1/IL6R/IGF1
GO:0044783	G1 DNA damage checkpoint	4/96	0.000695853	0.00492278	CCND1/E2F1/CDKN1A/CDC25C
GO:0001844	protein insertion into mitochondrial membrane involved in apoptotic signaling pathway	3/96	0.000700364	0.00492278	BCL2/E2F1/BCL2L11
GO:0048873	homeostasis of number of cells within a tissue	3/96	0.000700364	0.00492278	BCL2/AKT3/CSF1
GO:0060603	mammary gland duct morphogenesis	3/96	0.000700364	0.00492278	ESR1/VDR/CSF1
GO:0042542	response to hydrogen peroxide	5/96	0.000712221	0.00499502	BCL2/EZH2/HSPD1/HMOX1/SLC8A1
GO:0070371	ERK1 and ERK2 cascade	7/96	0.000725547	0.00507146	MYC/HAND2/PDGFRA/IGF1/CCR7/BMP2/PTGER4
GO:0051249	regulation of lymphocyte activation	9/96	0.000726326	0.00507146	BCL2/ZEB1/CDKN1A/CAV1/HSPD1/IL10/FAS/IGF1/CCR7
GO:0002262	myeloid cell homeostasis	5/96	0.000738375	0.00514423	VEGFA/BCL2L11/KIT/HMOX1/EPAS1
GO:0010039	response to iron ion	3/96	0.000769663	0.00530246	BCL2/CCND1/HMOX1
GO:0014911	positive regulation of smooth muscle cell migration	3/96	0.000769663	0.00530246	BCL2/IGF1/LPAR1
GO:0043276	anoikis	3/96	0.000769663	0.00530246	BCL2/E2F1/CAV1
GO:0034109	homotypic cell-cell adhesion	4/96	0.000772821	0.00530246	ITGB3/PDGFRA/PIK3CG/PRKG1
GO:0046823	negative regulation of nucleocytoplasmic transport	4/96	0.000772821	0.00530246	AXIN2/IL10/MXI1/DYRK2
GO:0060419	heart growth	4/96	0.000772821	0.00530246	FGFR1/PROX1/IGF1/FGF9
GO:0072078	nephron tubule morphogenesis	4/96	0.000772821	0.00530246	BCL2/MYC/VEGFA/BMP2
GO:0040029	regulation of gene expression, epigenetic	7/96	0.0007928	0.00541625	HMGA1/EZH2/CHEK1/ESR1/DNMT3B/BRCA1/KAT2B
GO:0060402	calcium ion transport into cytosol	5/96	0.000792831	0.00541625	BCL2/CAV1/CCR7/SLC8A1/JPH2
GO:0050772	positive regulation of axonogenesis	4/96	0.000813477	0.00554532	ZEB2/VEGFA/CXCL12/LIMK1
GO:0061351	neural precursor cell proliferation	5/96	0.000821157	0.00558563	ZEB2/VEGFA/SOX5/FGFR1/PROX1
GO:0003156	regulation of animal organ formation	3/96	0.000843177	0.0056744	HAND2/FGFR1/BMP2
GO:0030224	monocyte differentiation	3/96	0.000843177	0.0056744	MYC/VEGFA/CSF1
GO:0051204	protein insertion into mitochondrial membrane	3/96	0.000843177	0.0056744	BCL2/E2F1/BCL2L11
GO:0090218	positive regulation of lipid kinase activity	3/96	0.000843177	0.0056744	KIT/PDGFRA/CCR7
GO:1903131	mononuclear cell differentiation	3/96	0.000843177	0.0056744	MYC/VEGFA/CSF1
GO:0001889	liver development	5/96	0.000850232	0.00570973	EZH2/CCND1/PROX1/HMOX1/IL10
GO:0071260	cellular response to mechanical stimulus	4/96	0.00085562	0.00572162	CHEK1/FAS/PTGER4/TNFRSF10B
GO:0072088	nephron epithelium morphogenesis	4/96	0.00085562	0.00572162	BCL2/MYC/VEGFA/BMP2
GO:0006606	protein import into nucleus	7/96	0.000864897	0.0057593	CDKN1A/AXIN2/IL10/IGF1/FGF9/MXI1/DYRK2
GO:0044744	protein targeting to nucleus	7/96	0.000864897	0.0057593	CDKN1A/AXIN2/IL10/IGF1/FGF9/MXI1/DYRK2
GO:0007160	cell-matrix adhesion	6/96	0.000878339	0.00583653	BCL2/ITGB3/VEGFA/BCL2L11/CSF1/CCR7
GO:0030522	intracellular receptor signaling pathway	7/96	0.000883707	0.00585988	EZH2/CCNE1/ESR1/VDR/BRCA1/THRB/PPARGC1A
GO:0019218	regulation of steroid metabolic process	4/96	0.00089928	0.00593825	VDR/PROX1/PPARGC1A/BMP2
GO:0021766	hippocampus development	4/96	0.00089928	0.00593825	ZEB2/EZH2/PROX1/PHLPP2
GO:0030178	negative regulation of Wnt signaling pathway	6/96	0.000901716	0.00594193	CCND1/PTPRO/AXIN2/CAV1/FGF9/BMP2
GO:0043433	negative regulation of sequence-specific DNA binding transcription factor activity	5/96	0.000910678	0.00598851	EZH2/ESR1/HAND2/PROX1/HMOX1
GO:0017145	stem cell division	3/96	0.000921004	0.00601489	SOX5/KIT/FGFR1
GO:0038066	p38MAPK cascade	3/96	0.000921004	0.00601489	VEGFA/HAND2/BMP2
GO:0060612	adipose tissue development	3/96	0.000921004	0.00601489	CDK4/CSF1/PPARGC1A
GO:1902593	single-organism nuclear import	7/96	0.000922296	0.00601489	CDKN1A/AXIN2/IL10/IGF1/FGF9/MXI1/DYRK2
GO:0061008	hepaticobiliary system development	5/96	0.000942074	0.00610923	EZH2/CCND1/PROX1/HMOX1/IL10
GO:0061333	renal tubule morphogenesis	4/96	0.000944488	0.00610923	BCL2/MYC/VEGFA/BMP2
GO:0072028	nephron morphogenesis	4/96	0.000944488	0.00610923	BCL2/MYC/VEGFA/BMP2
GO:1900181	negative regulation of protein localization to nucleus	4/96	0.000944488	0.00610923	AXIN2/IL10/MXI1/DYRK2
GO:1901991	negative regulation of mitotic cell cycle phase transition	6/96	0.000949907	0.00613175	BCL2/EZH2/CCND1/E2F1/CDKN1A/CDC25C
GO:1901652	response to peptide	9/96	0.000970122	0.00624948	CDK4/CCNA2/CDC6/CXCL12/CAV1/TRIB3/KAT2B/IL10/CPEB1
GO:0002367	cytokine production involved in immune response	4/96	0.000991272	0.00635982	KIT/HSPD1/HMOX1/IL10
GO:0071674	mononuclear cell migration	4/96	0.000991272	0.00635982	PTPRO/CXCL12/CSF1/IL6R
GO:0001894	tissue homeostasis	6/96	0.00100006	0.00640321	BCL2/ITGB3/VEGFA/AKT3/CSF1/EPAS1
GO:0016572	histone phosphorylation	3/96	0.00100324	0.00641062	CCNA2/AURKB/CHEK1
GO:0031668	cellular response to extracellular stimulus	6/96	0.00102589	0.00652894	BCL2/CDKN1A/VDR/HMOX1/FAS/MYOCD
GO:1901617	organic hydroxy compound biosynthetic process	6/96	0.00102589	0.00652894	ZEB2/VDR/HAND2/PROX1/CYP19A1/BMP2
GO:0001764	neuron migration	5/96	0.0010411	0.00661248	VEGFA/CXCL12/FGFR1/KIF20B/PRKG1
GO:0007568	aging	7/96	0.0010461	0.00663092	BCL2/HMGA1/AURKB/CDKN1A/CHEK1/IL10/PPARGC1A
GO:0051051	negative regulation of transport	9/96	0.00104853	0.00663299	BCL2/ITGB3/AXIN2/CAV1/HMOX1/IL10/MXI1/PTGER4/DYRK2
GO:0051924	regulation of calcium ion transport	6/96	0.00107908	0.00681264	BCL2/CXCL12/CAV1/PIK3CG/SLC8A1/JPH2
GO:0019217	regulation of fatty acid metabolic process	4/96	0.00108969	0.00686592	BRCA1/CAV1/TRIB3/PPARGC1A
GO:0060401	cytosolic calcium ion transport	5/96	0.00114767	0.00721685	BCL2/CAV1/CCR7/SLC8A1/JPH2
GO:0050727	regulation of inflammatory response	7/96	0.00115897	0.00726876	ESR1/HSPD1/IL10/CYP19A1/CCR7/PIK3CG/PTGER4
GO:0046822	regulation of nucleocytoplasmic transport	6/96	0.00116282	0.00726876	CDKN1A/AXIN2/IL10/IGF1/MXI1/DYRK2
GO:1901988	negative regulation of cell cycle phase transition	6/96	0.00116282	0.00726876	BCL2/EZH2/CCND1/E2F1/CDKN1A/CDC25C
GO:0032467	positive regulation of cytokinesis	3/96	0.00118133	0.007338	AURKB/CDC6/KIF20B
GO:0048536	spleen development	3/96	0.00118133	0.007338	BCL2/BCL2L11/FAS
GO:1901030	positive regulation of mitochondrial outer membrane permeabilization involved in apoptotic signaling pathway	3/96	0.00118133	0.007338	BCL2/E2F1/BCL2L11
GO:0032874	positive regulation of stress-activated MAPK cascade	5/96	0.00118492	0.007338	ZEB2/VEGFA/HAND2/CCR7/BMP2
GO:0006919	activation of cysteine-type endopeptidase activity involved in apoptotic process	4/96	0.00119477	0.007338	HSPD1/FAS/CASP7/TNFRSF10B
GO:0031058	positive regulation of histone modification	4/96	0.00119477	0.007338	VEGFA/DNMT3B/BRCA1/PPARGC1A
GO:0042475	odontogenesis of dentin-containing tooth	4/96	0.00119477	0.007338	BCL2L11/HAND2/CSF1/BMP2
GO:0043255	regulation of carbohydrate biosynthetic process	4/96	0.00119477	0.007338	KAT2B/PPARGC1A/IGF1/DYRK2
GO:0045778	positive regulation of ossification	4/96	0.00119477	0.007338	IL6R/IGF1/SLC8A1/BMP2
GO:0048592	eye morphogenesis	5/96	0.00122307	0.00748272	BCL2/MEIS1/ZEB1/VEGFA/PROX1
GO:0070304	positive regulation of stress-activated protein kinase signaling cascade	5/96	0.00122307	0.00748272	ZEB2/VEGFA/HAND2/CCR7/BMP2
GO:0051983	regulation of chromosome segregation	4/96	0.00124989	0.00763205	AURKB/CDC6/AXIN2/UBE2C
GO:0016579	protein deubiquitination	7/96	0.00125597	0.00763971	CCNA2/MYC/CDC25A/ESR1/AXIN2/BRCA1/KAT2B
GO:0032956	regulation of actin cytoskeleton organization	7/96	0.00125597	0.00763971	CXCL12/PROX1/PDGFRA/CCR7/LPAR1/LIMK1/PTGER4
GO:0030902	hindbrain development	5/96	0.00126211	0.00766232	BCL2/EZH2/PROX1/PPARGC1A/LPAR1
GO:0035924	cellular response to vascular endothelial growth factor stimulus	3/96	0.00127736	0.00772523	VEGFA/PDGFRA/NRP2
GO:0042181	ketone biosynthetic process	3/96	0.00127736	0.00772523	PPARGC1A/CYP19A1/BMP2
GO:0060070	canonical Wnt signaling pathway	7/96	0.00128119	0.00773362	MYC/CCND1/PTPRO/AXIN2/CAV1/FGF9/BMP2
GO:0008202	steroid metabolic process	7/96	0.00133282	0.00798432	ESR1/VDR/FGFR1/PROX1/PPARGC1A/CYP19A1/BMP2
GO:0043010	camera-type eye development	7/96	0.00133282	0.00798432	ZEB2/CDK4/MEIS1/ZEB1/VEGFA/PROX1/PDGFRA
GO:0051170	nuclear import	7/96	0.00133282	0.00798432	CDKN1A/AXIN2/IL10/IGF1/FGF9/MXI1/DYRK2
GO:0051235	maintenance of location	7/96	0.00133282	0.00798432	ITGB3/CAV1/IL10/CCR7/SLC8A1/MXI1/JPH2
GO:0014074	response to purine-containing compound	5/96	0.00134296	0.0080128	DNMT3B/HSPD1/PPARGC1A/PIK3CG/SLC8A1
GO:0048771	tissue remodeling	5/96	0.00134296	0.0080128	ITGB3/VDR/HAND2/CAV1/EPAS1
GO:0071560	cellular response to transforming growth factor beta stimulus	6/96	0.00134518	0.0080128	ZEB1/COL1A2/SOX5/CAV1/PPARGC1A/MYOCD
GO:0016055	Wnt signaling pathway	9/96	0.00135452	0.0080394	ZEB2/MYC/CCND1/CCNE1/PTPRO/AXIN2/CAV1/FGF9/BMP2
GO:0071158	positive regulation of cell cycle arrest	4/96	0.00136542	0.0080394	E2F1/CDKN1A/BRCA1/CDC25C
GO:0006816	calcium ion transport	8/96	0.00136778	0.0080394	BCL2/VDR/CXCL12/CAV1/CCR7/PIK3CG/SLC8A1/JPH2
GO:0198738	cell-cell signaling by wnt	9/96	0.00137456	0.0080394	ZEB2/MYC/CCND1/CCNE1/PTPRO/AXIN2/CAV1/FGF9/BMP2
GO:0010718	positive regulation of epithelial to mesenchymal transition	3/96	0.00137817	0.0080394	EZH2/AXIN2/BMP2
GO:1905207	regulation of cardiocyte differentiation	3/96	0.00137817	0.0080394	IGF1/MYOCD/BMP2
GO:0042482	positive regulation of odontogenesis	2/96	0.00138014	0.0080394	CSF1/BMP2
GO:0048845	venous blood vessel morphogenesis	2/96	0.00138014	0.0080394	VEGFA/PROX1
GO:0048875	chemical homeostasis within a tissue	2/96	0.00138014	0.0080394	VEGFA/EPAS1
GO:0060484	lung-associated mesenchyme development	2/96	0.00138014	0.0080394	FGFR1/FGF9
GO:2000586	regulation of platelet-derived growth factor receptor-beta signaling pathway	2/96	0.00138014	0.0080394	PDGFRA/MYOCD
GO:2000615	regulation of histone H3-K9 acetylation	2/96	0.00138014	0.0080394	CHEK1/BRCA1
GO:0016573	histone acetylation	5/96	0.00138479	0.00805166	CHEK1/BRCA1/KAT2B/PPARGC1A/MYOCD
GO:0030217	T cell differentiation	6/96	0.00141058	0.00814173	BCL2/ZEB1/KIT/FAS/CCR7/PTGER4
GO:0046488	phosphatidylinositol metabolic process	6/96	0.00141058	0.00814173	KIT/FGFR1/FGF7/PDGFRA/PIK3CG/FGF9
GO:0071559	response to transforming growth factor beta	6/96	0.00141058	0.00814173	ZEB1/COL1A2/SOX5/CAV1/PPARGC1A/MYOCD
GO:1900180	regulation of protein localization to nucleus	6/96	0.00141058	0.00814173	CDKN1A/AXIN2/IL10/IGF1/MXI1/DYRK2
GO:0002683	negative regulation of immune system process	8/96	0.00143776	0.00828351	MYC/MEIS1/CXCL12/HMOX1/IL10/FAS/CYP19A1/PTGER4
GO:0043029	T cell homeostasis	3/96	0.00148385	0.00851801	BCL2/BCL2L11/FAS
GO:0045773	positive regulation of axon extension	3/96	0.00148385	0.00851801	VEGFA/CXCL12/LIMK1
GO:0032147	activation of protein kinase activity	7/96	0.00149755	0.00856556	ITGB3/VEGFA/KIT/IGF1/LPAR1/BMP2/TNFRSF10B
GO:0071375	cellular response to peptide hormone stimulus	7/96	0.00149755	0.00856556	CDK4/CCNA2/CDC6/CAV1/TRIB3/KAT2B/CPEB1
GO:0045785	positive regulation of cell adhesion	8/96	0.00151057	0.00862393	VEGFA/CXCL12/CAV1/HSPD1/CSF1/IL10/IGF1/CCR7
GO:0051402	neuron apoptotic process	6/96	0.00151321	0.00862393	BCL2/BCL2L11/HSPD1/HMOX1/FAS/PPARGC1A
GO:0006937	regulation of muscle contraction	5/96	0.00151606	0.00862464	CAV1/PIK3CG/SLC8A1/MYOCD/PRKG1
GO:0010522	regulation of calcium ion transport into cytosol	4/96	0.0015524	0.00879972	BCL2/CAV1/SLC8A1/JPH2
GO:0042100	B cell proliferation	4/96	0.0015524	0.00879972	BCL2/CDKN1A/HSPD1/IL10
GO:0042992	negative regulation of transcription factor import into nucleus	3/96	0.00159448	0.00900598	IL10/MXI1/DYRK2
GO:0043551	regulation of phosphatidylinositol 3-kinase activity	3/96	0.00159448	0.00900598	KIT/PDGFRA/CCR7
GO:0008361	regulation of cell size	5/96	0.00160852	0.00903686	CDK4/VEGFA/CXCL12/AKT3/LIMK1
GO:0018393	internal peptidyl-lysine acetylation	5/96	0.00160852	0.00903686	CHEK1/BRCA1/KAT2B/PPARGC1A/MYOCD
GO:0050770	regulation of axonogenesis	5/96	0.00160852	0.00903686	ZEB2/VEGFA/PTPRO/CXCL12/LIMK1
GO:1905269	positive regulation of chromatin organization	4/96	0.0016185	0.00907678	VEGFA/DNMT3B/BRCA1/PPARGC1A
GO:0009755	hormone-mediated signaling pathway	6/96	0.00165879	0.00926109	CCNE1/ESR1/VDR/BRCA1/THRB/PPARGC1A
GO:0070646	protein modification by small protein removal	7/96	0.00167779	0.00926109	CCNA2/MYC/CDC25A/ESR1/AXIN2/BRCA1/KAT2B
GO:0070997	neuron death	7/96	0.00167779	0.00926109	BCL2/BCL2L11/MEOX2/HSPD1/HMOX1/FAS/PPARGC1A
GO:0002676	regulation of chronic inflammatory response	2/96	0.00168064	0.00926109	IL10/CYP19A1
GO:0035630	bone mineralization involved in bone maturation	2/96	0.00168064	0.00926109	IGF1/BMP2
GO:0043619	regulation of transcription from RNA polymerase II promoter in response to oxidative stress	2/96	0.00168064	0.00926109	HMOX1/EPAS1
GO:0045722	positive regulation of gluconeogenesis	2/96	0.00168064	0.00926109	KAT2B/PPARGC1A
GO:0045793	positive regulation of cell size	2/96	0.00168064	0.00926109	CDK4/AKT3
GO:0051152	positive regulation of smooth muscle cell differentiation	2/96	0.00168064	0.00926109	KIT/MYOCD
GO:0060736	prostate gland growth	2/96	0.00168064	0.00926109	ESR1/CYP19A1
GO:0007589	body fluid secretion	4/96	0.00168653	0.00926125	CCND1/VEGFA/VDR/CAV1
GO:0021549	cerebellum development	4/96	0.00168653	0.00926125	EZH2/PROX1/PPARGC1A/LPAR1
GO:2001252	positive regulation of chromosome organization	5/96	0.00170507	0.00934231	AURKB/VEGFA/DNMT3B/BRCA1/PPARGC1A
GO:0031589	cell-substrate adhesion	7/96	0.0017094	0.00934231	BCL2/ITGB3/VEGFA/PTPRO/BCL2L11/CSF1/CCR7
GO:1903727	positive regulation of phospholipid metabolic process	3/96	0.00171015	0.00934231	KIT/PDGFRA/CCR7
GO:0022407	regulation of cell-cell adhesion	8/96	0.00174673	0.00952572	ZEB1/CXCL12/CAV1/HSPD1/IL10/IGF1/CCR7/PRKG1
GO:0090317	negative regulation of intracellular protein transport	4/96	0.00175652	0.00956259	AXIN2/IL10/MXI1/DYRK2
GO:0031334	positive regulation of protein complex assembly	6/96	0.0017748	0.00964552	ESR1/VEGFA/BCL2L11/MITF/FAS/CCR7
GO:0030177	positive regulation of Wnt signaling pathway	5/96	0.0018058	0.0097804	ZEB2/AXIN2/CAV1/FGF9/BMP2
GO:0030307	positive regulation of cell growth	5/96	0.0018058	0.0097804	BCL2/VEGFA/CXCL12/IGF1/LIMK1
GO:0048010	vascular endothelial growth factor receptor signaling pathway	4/96	0.0018285	0.00983231	ITGB3/VEGFA/FGF9/NRP2
GO:0060993	kidney morphogenesis	4/96	0.0018285	0.00983231	BCL2/MYC/VEGFA/BMP2
GO:0072080	nephron tubule development	4/96	0.0018285	0.00983231	BCL2/MYC/VEGFA/BMP2
GO:0060976	coronary vasculature development	3/96	0.00183093	0.00983231	VEGFA/HAND2/MYOCD
GO:2000107	negative regulation of leukocyte apoptotic process	3/96	0.00183093	0.00983231	AURKB/CXCL12/CCR7
GO:0006475	internal protein amino acid acetylation	5/96	0.00185778	0.00992592	CHEK1/BRCA1/KAT2B/PPARGC1A/MYOCD
GO:0018394	peptidyl-lysine acetylation	5/96	0.00185778	0.00992592	CHEK1/BRCA1/KAT2B/PPARGC1A/MYOCD
GO:0048469	cell maturation	5/96	0.00185778	0.00992592	BCL2/CDKN1A/VEGFA/FGFR1/EPAS1
